# Supplementary material for: A wind-driven snow redistribution module for Alpine3D v3.3.0: Adaptations designed for downscaling ice sheet surface mass balance
Source: Copernicus journal article supplement (doi:10.5194/gmd-2022-28), 2022-03-29
Supplement: Supplementary file [file gmd-2022-28-AC1-supplement.pdf]

Thank you to editor Fabien Maussion as well as Charles Amory and the other, anonymous, reviewer for donating their time and energy to our manuscript. In order to address all comments, we have responded to each of them individually in [blue](#). Line numbers in our responses refer to the track-changed version of the revised manuscript. Some newly added citations in our responses can be found in the revised manuscript.

We apologize for the very long delay in responding to the reviewers comments and revising the manuscript. We thank the editor, reviewers and editorial office for their patience and understanding that this is the unfortunate result of the first, second and last author having transitioned between jobs, as well as moving, in the last year.

On behalf all authors,

Eric Keenan

## **Review #1 - Anonymous**

### **General comments:**

The article "A wind-driven snow redistribution module for Alpine3D v3.3.0: Adaptations designed for downscaling ice sheet surface mass balance" presents a strategy for downscaling large scale surface mass balance (SMB) predictions using Alpine3D. Alpine3D is a 3-D model that computes the mass and energy balances of snow covered regions by solving the 1-D snow model SNOWPACK at each grid cell. In the proposed methodology, the meteorological conditions are extracted from MERRA-2 and downscaled to the Alpine3D grid. In addition, snow drift events are modeled with a new 2-D advection scheme that takes into account a parameterization for the mass flux in saltation previously implemented in SNOWPACK. In order to correctly estimate snow drift, high resolution wind fields are needed. They are computed offline with the software WindNinja, which takes into account the small scale topographic features through a digital elevation model (DEM). The proposed approach has the potential to improve our understanding of SMB variability at small scales and can easily be applied to other locations. Even though the snow drift model needs further improvement, the coupling of MERRA-2 outputs, WindNinja wind fields and a snow drift scheme with Alpine3D has significant scientific value. In addition, from the comparison between Alpine3D and the measured annual-averaged snow accumulation over a 130 km transect, the authors show the importance of wind redistribution of snow to the local SMB. However, I think the manuscript can be improved, both from a strategic and scientific points of view. Besides the scientific comments presented below I have one general comment:

1) The article risks promising more than it gives regarding the snow drift model. Emphasis is given to snow drift in the title, in the abstract and in the introduction. However, even though the treatment of erosion and deposition presented in section 2.4 can be considered new, it is highly dependent on the parameterizations for the fluid threshold friction velocity and the mass flux in saltation (eqs. 3 and 4). In particular, it is shown and stated by the authors that equation 4 is highly uncertain, as it relies on a poorly constrained parameter. These equations are standard in SNOWPACK and no improvement is suggested by the authors. In addition, it is not clearly stated why this snow drift model is better than the one previously implemented in Alpine3D (Lehning et al. 2006). In this way, I would suggest counter-balancing the focus on the snow drift model with an extended description of the peripheral developments that are of the utmost importance for a successful downscaling: the downscaling of MERRA-2 meteorological forcing to the Alpine3D grid, the use of WindNinja with the ICESat-2 DEM, and the coupling of WindNinja to Alpine3D. In my view, the technical details of

these contributions are of interest to the users of Alpine3D or other models alike. In addition, it is aligned with the scope of the GMD journal.

We thank the reviewer for this feedback and we agree that indeed some more context would be helpful to include for the reader. First, we would like to mention that we consider redeveloping the saltation mass flux parameterizations, as the one we used in Eq. 4, to be out of scope for this study. Particularly since we have achieved satisfying results using this parameterization in earlier work (Keenan et al., 2021, Wever et al., 2022). We consider the study presented in this manuscript as a 2D expansion of the 1D modeling performed in those studies, which we think justifies leaving the current saltation mass flux calculations in SNOWPACK untouched. Furthermore, it is important to note that the snow drift module as used before by for example Lehning et al. (2006), Mott et al. (2008), and Groot-Zwaafink et al. (2013b), requires 3D wind speed fields at high temporal resolution, which would require a weather model downscaling tool, which adds substantial complexity to such a study. The fully 3D model is also computationally intensive, as it currently is not parallelized. This means that earlier model studies were restricted to shorter time periods (i.e., simulating a winter season, or a case study) and/or relatively small domain. Finally, it is more difficult to maintain mass balance in the current implementation of the 3D model, since snow and precipitation may remain in suspension and never reach the surface, while erosion is restricted to one layer per time step for code simplicity. Solving the fully 3D suspension, considering the added computational effort, is also not guaranteed to provide much better agreement, as discrepancies with observed snow accumulations have been reported (e.g., Mott et al., 2008, Mott et al., 2010, Gerber et al., 2017), such that we think it is justified to test simpler approaches like the one in our study. In our approach, we avoid these computationally challenging issues. Also note here that the full 3D snowdrift model in fact calls the exact same snow drift functions in the SNOWPACK model to determine drifting snow mass flux as we are applying in this study. We now provide more explanation in the manuscript (see L83-87).

### **Specific comments:**

I.13-14: Taking into account the focus that is given in the Conclusions regarding the effect of the parameter  $L$ , I suggest moving the focus in this sentence from the underestimation of SMB variability to the sensitivity of the snow accumulation patterns to the saltation model employed.

Excellent point. We have revised to (see L14-17):

“Despite these improvements, our results also demonstrate that considerable uncertainty stems from the employed saltation model, confounding simulations of surface mass balance variability.”

I.19-21: The terms drifting and blowing snow are used both to define the processes of aeolian snow transport and the particles aloft. This paragraph focuses on processes (precipitation, sublimation, etc). Hence, I suggest rephrasing so that drifting and blowing snow are presented as processes. An example is provided to clarify the comment made: "Additionally, local SMB is influenced by wind redistribution of snow. This process is generally defined as drifting snow (when the snow particles are transported by the wind in the first 2 m above the snow surface) or blowing snow (when the snow particles are transported by the wind at greater heights - above 2 m height). We refer to deposition when drifting and blowing snow lead to net mass gain and to erosion when they lead to mass loss."

In retrospect, we agree that our description was rather clunky. We have revised to the following (see L22-27):

"Additionally, local SMB is influenced by the process of wind-driven snow redistribution, which we refer to as deposition in the case of local mass gain and erosion in the case of mass loss (Lenaerts and van den Broeke, 2012). Wind-driven snow redistribution is generally divided into two categories, drifting snow, where snow particles are transported by the wind in the lowermost 2 m of the atmosphere, and blowing snow where snow is redistributed at heights greater than 2 m."

I.34-35: More recent works can be cited describing the effect of interparticle cohesion not only on the fluid threshold but in the whole saltation dynamics (e.g. Comola et al. 2019, Melo et al. 2022).

Thanks for bringing these studies to our attention. Indeed they both provide recent insight into saltation dynamics and snow particle cohesion. Thus we have added their citations to the corresponding sentence (see L40-41).

I.39: I suggest citing also the early work of Schmidt (1980) on the impact of interparticle ice bonds on the fluid threshold.

Thanks for the comment. We unintentionally neglected a discussion of impact forces on the development and sustainment of saltation. We've revised the mentioned sentence to the following (see L44-46):

When the combined effect of surface wind stress and impact force from saltating particles exceeds cohesive forces at the snow surface, saltation of snow particles is initiated or maintained within the lowermost 10 cm of the atmosphere (Schmidt, 1980; Pomeroy and Gray, 1990).

I.42: The work of Amory et al. (2021) can also be cited here - a parameterization for drifting snow compaction is also proposed in their work.

Good point. We have added this reference (see L62).

I.85-86: Is this a standard assumption? Maybe the authors can clarify its validity.

We are not sure if this assumption could really pass with the qualifier “standard”, but it has been noted in literature before. For example, Fig. 1.3 in Ligtenberg (2014) shows the dissipation of seasonal temperature fluctuations in the uppermost 10m of the firn, to which the author makes the following remark: “... and the local temperature is equal to the long-term average surface temperature.” As we already noted in the manuscript, we also applied this boundary condition in our previous study (Keenan et al., 2021). Furthermore, Alley and Koci (1990) note that “At dry-snow sites such as GISP2, the temperature at 10 m depth typically is within a few tenths of a degree of the mean annual air temperature, with the firn usually colder than the air; however, the difference can be as large as a few degrees”. From this, we believe our boundary condition is a reasonable simplification, particularly in the absence of a clear alternative approach, without having the need to simulate the full firn column.

In order to provide more justification for this assumption, we have revised the text to (see L112-116):

“We follow Keenan et al., 2021, by applying the MERRA-2 mean annual surface temperature as a Dirichlet thermodynamic boundary condition at the bottom of the firn column. This assumption is supported by observations from the dry snow zone of the Greenland ice sheet, where differences between mean annual air temperature and firn temperature at 10m were found to be typically within a few tenths of a degree (Alley and Koci, 1990). Ligtenberg (2014) also shows in a model result that the seasonal cycle in firn temperature disappears around 10m depth.”

I.121: Even though  $\Phi$  has units of mass flux ( $\text{kg}/\text{m}^2/\text{s}$ ), it can only be considered a mass flux if the mass rate of saltating particles per unit width,  $Q$  ( $\text{kg}/\text{m}/\text{s}$ ), is assumed to be deposited along a fetch of  $L$  meters long. From my point of view, only in this way it makes sense to describe  $\Phi$  as the mass rate of particles "crossing" the section  $L_y$  times  $L_x$ , where  $L_y$  is the width and  $L_x$  is the fetch length  $L$ . Is this the meaning of  $L$ ? Even though this parameter is not well constrained, I think an effort should be made to better define it.

“Even though  $\Phi$  has units of mass flux ( $\text{kg}/\text{m}^2/\text{s}$ ), it can only be considered a mass flux if the mass rate of saltating particles per unit width,  $Q$  ( $\text{kg}/\text{m}/\text{s}$ ), is assumed to be

deposited along a fetch of  $L$  meters long.” This is correct and indeed how we conceptualize  $L$ .

To clarify the definition of  $L$ , we have added (see L156-157) the following brief explanation and reference to our Keenan et al. (2021) paper in which we go into greater detail on the saltation scheme.

“ $L$  can be conceptually understood to represent the distance over which the originally upwind and now saltating particles have been eroded from the snow surface (Keenan et al, 2021).”.

I.124 (eq.4): The numerator of this equation corresponds to the expression proposed by Sørensen (1991) for the transport rate (see page 75 of the article, eq. 3.22). This expression is in units of g/cm/s (this is stated at the end of page 72 of the article, below equation 3.9). This poses a problem because the coefficients 0.0014 and 205 are not dimensionless values - 205 has velocity units (cm/s) and 0.0014 has units of s<sup>2</sup>/cm. If we want to express  $Q$  in units of kg/m/s, these factors should change to 2.05 and 0.14, respectively. The dimensionally correct expression predicts much higher values of  $Q$  and its validity to model snow saltation is still to be assessed. This issue with the Sørensen's expression was previously pointed out in the PhD thesis of Vionnet (2012), page 103, Fig. 5.3 (french only). In the mentioned PhD thesis as well as in Vionnet et al. (2014), the use of the latest expression of Sørensen (2004) is proposed. This can be a good option for Alpine3D as it does not deviate significantly from the dimensionally wrong Sørensen equation (see Fig.5.3 in the PhD thesis). Independently of the approach chosen by the authors, I believe it is advisable to present  $Q$  - the numerator of eq.4 - in a separate equation and cite the respective article.

Thank you for pointing this out. Indeed, after looking into the original reference, we agree that the magnitudes of the parameters in our implementation are incorrect. Furthermore, we have implemented your suggestion and now explicitly define the numerator of eq. 4 as  $Q$ .

Unfortunately this error seems to have been introduced in SNOWPACK by Lehning and Fierz (2008) and at this point remains unfixed. We have created an issue in our source code repository to be fixed in the future.

<https://github.com/snowpack-model/snowpack/issues/24>

Now, we would like to recall here that we build upon the work by Keenan et al. (2021) and Wever et al. (2022), who showed how the erosion and deposition calculated using the currently implemented code yielded satisfying results. The fact that an incorrect parameterization could yield satisfying results can be understood when considering that  $Q$  is already scaled by the poorly constrained tuning parameter  $L$ , such that any

changes in the formulation of  $Q$  could be accompanied by varying the fetch length  $L$  to maintain similarly good performance. Lastly, correcting this parameterization and updating the simulations for this manuscript would require substantial additional effort, that, in light of what we mention above, may have little impact on the conclusions in this work. Nevertheless, transparency of this issue is necessary, thus, in order to account for your astute (and very welcomed!) comment, we have added the following text (see L179-190):

“Additionally, it has come to our attention that SNOWPACK’s parameterization of  $Q$  does not perfectly match the original parameterization proposed by Sørensen (1991). As noted in Vionnet (2012), the parameters 0.0014 and 205 in Eq. 4 reflect units for  $Q$  of  $g\ cm^{-1}\ s^{-1}$ , whereas here we define  $Q$  with units of  $kg\ m^{-1}\ s^{-1}$ . This implementation error in SNOWPACK was introduced by Lehning and Fierz (2008), but since we build upon the previous work by Keenan et al. (2021); Wever et al. (2022), who showed satisfying results for erosion and deposition calculated using the currently implemented code, we did not correct this error. Practically speaking, this error leads SNOWPACK to underestimate the magnitude of  $Q$  compared to the intended parameterization described in Sørensen (1991). However, it is also important to note here that  $Q$  is ultimately scaled by the poorly constrained tuning parameter  $L$ , such that any changes in the formulation of  $Q$  could require a new choice for the fetch length  $L$  to maintain similarly good performance. Thus, it is not certain that updating our parameterization of  $Q$  would lead to improved or more physically meaningful results. That said, future studies could consider using the updated parameterization of  $Q$  introduced in Sørensen (2004) which Vionnet (2012) showed to produce similar results to our presently dimensionally incorrect parameterization of  $Q$  (Vionnet et al., 2014).”

I.131-132 (point 1): The wind field at multiple vertical levels cannot be computed with WindNinja?

WindNinja could in fact save output at multiple vertical levels. However, what we try to illustrate here is that this is not necessary in our approach. We only need to save and calculate the wind speed at 10 m. This allows for a highly efficient coupling to the Alpine3D model. To make this more clear we have revised to the following (see L170-171):

“full prognostic solution of blowing snow transport via suspension requires numerically expensive calculations using wind vector fields at multiple vertical levels (Lehning et al., 2006, Sharma et al., 2021)”

I.133-134 (point 3): This is not advisable at high wind speeds because the aeolian transport of snow stops being governed by the wind field close to the ground alone. In addition, the saltation velocity considered in eq.7 would have to be revised (it describes

saltation only as suspended particles are expected to have velocities comparable to the wind speed).

Given your remark and the remarks in the review by Charles Amory on the importance of suspension versus saltation, we now do agree that the argument that we use the fetch length to naively account for suspension is not as justified as we made it sound, as you pointed out. It is indeed better not to aim to include suspension in saltation given the different advection speeds. We rephrased this paragraph to better reflect these notions (see L173-178).

I.144 (eq.6): I believe the variable  $u_s$  should be defined in a more clear way: does it represent the particles speed or the wind speed in the saltation layer? Pomeroy and Gray (1990) proposed  $2.8u_{th}$  as the average particle speed inside the saltation layer. However, if eq.6 is a mass conservation equation, where the quantity  $M_s$  is being advected by the flow,  $u_s$  should represent the wind speed. The wind speed in the saltation layer must be higher than the particles speed so that the particles are continuously accelerated. Do the authors consider these two quantities to be equal so that the mass in saltation is considered a passive scalar?

We indeed defined  $u_s$  similar to Pomeroy and Gray (1990), so it represents the particle speed. To make this more clear, we now write (see L198): “In our implementation,  $u_s$  represents the saltation particle speed and is defined as parallel to the 10m wind speed unit vector...” Since the wind speed concerns the speed of the molecules in the air, any quantity associated with that should indeed be advected with the wind speed (for example, temperature and humidity). However, the saltating particles do not travel with the same speed as the air molecules, but at a lower speed. This is due to the constant interaction of the particles with the surface, leading to decelerations and accelerations relative to the governing wind speed. So we cannot assume that the wind speed and particle speed are the same. So in this case, the quantity of interest is advected by the flow of saltating particles, not air particles, and we maintain that mass conservation is not violated in Eq. 6.

I.175-176: It is not clear if Alpine3D is ran for some time before the time period of interest in order to improve the initial state of the firn column. I suggest making it clear in the text.

Excellent point. Indeed we did not make this clear. Also the other review indicated that more explanation of the spinup procedure is required, which we added (see L240-L249). We do not run Alpine3D for any period of time before the analyzed time period (2015 - 2020). We have updated the text to the following in order to more clearly reflect this implementation (see L249-251):



“Alpine3D downscaling is then launched at the beginning of the analysis period (2015 in this study), meaning that although we initialize Alpine3D with a spun up firn column, its properties initially reflect the non-downscaled MERRA-2 climate.”

I.191: Please specify over what years was the annual average performed.

Unfortunately, answering this question uniformly is not possible. In simple terms, these observations are produced by counting the number of annual layers in the top 50 m of the firn column. Because annual layer thickness varies spatially, the number of years over which the average is performed also varies spatially. We’ve added the following sentence (see L270-272):

“This product intends to represent the annual-average SMB. However, because of the finite thickness of firn isochrones and spatially variable accumulation rates, the annual average is calculated over varying periods depending on the location.”

I.190-195: Can the authors say something about the uncertainty/accuracy of the snow accumulation predictions derived from the firn thickness?

The authors of the dataset do not provide quantitative uncertainty estimates for their annually averaged accumulation dataset. However, as stated in the text, the 25 km averages are set to that of MERRA-2. Thus, large scale uncertainties are controlled by MERRA-2.

That said, the authors do report relative accumulation errors that they describe as “negligibly small with a mean error of 0.002 (interpreted as 0.2%).” We have added the following to the text (see L272-273):

“No quantitative uncertainty estimates are assigned to the absolute SMB observations, however the authors report an average relative accumulation error of 0.2%.”

Fig.4 and 5: The observations signal (red line) seems the same in Figures 4c and 5c. However, the simulations correspond to different time periods (2015 only vs 2015-2020). Is the observation signal indeed the same? If yes, to what time period does it correspond?

Great question. Yes, the observational transect is the same in Figures 4c and 5b and represents a long-term annual average (i.e., comprising recent decades because this is a relatively high accumulation area and the product is built using radar soundings of near-surface firn). The exact time frame this transect corresponds to is unknown because 1) it is not reported by Dattler et. al. 2019 and 2) uncertainty associated with firn isochrone tracking. We revised the discussion in Section 2.7, following previous comments (see above), which we hope would also make this more clear.

I.225: The authors assume R-squared to be a proxy of the variance explained. As this is not accurate for all distributions, I suggest the authors to justify this assumption.

Thank you for bringing this point to our attention. We now state in the manuscript that we assume that the modeled and observed SMB are linearly related. Since we use Ordinary Least Squares to perform the regression analysis to calculate  $R^2$ , we also can assume that the mean of the residuals is zero, such that  $R^2$  corresponds to variance explained. We revised this in the manuscript (see L302-304).

I.245: Is the discrepancy between the Alpine3D and the MERRA-2 transect results completely explained by snow being drifted from the analysis domain to the 15km border? It is not clear why the comparison between Alpine3D and MERRA-2 along the whole analysis domain is directly related to the comparison between these two models along the transect.

You raise an excellent point. Thank you. Indeed the discrepancy between mean Alpine3D and MERRA-2 averaged over the analysis domain is largely explained by the divergence of drifting snow out of the analysis domain and into the 15 km border, which leaves less mass available for accumulation along the transect. To make this more clear, and to also point to the possibility of net divergence in the area due to the large scale wind field, we revised the sentence to (see L324-327):

“The discrepancy between MERRA-2 and Alpine3D along the transect is most likely explained by net divergence of saltating snow out of the analysis domain (Fig. 2), resulting in less mass available for accumulation along the transect. Since wind speeds generally increase from the top right to the bottom left over the model domain, some net divergence over the transect also may occur.”

I.255-256: In the manuscript, surface mass balance variability is completely attributed to snow redistribution. Even though it is well known that snow redistribution plays an important role, it would be interesting to compare the outputs of the Alpine3D downscaling with and without the snow drift model. This would isolate the effect of snow redistribution from the effect of spatially varying heat fluxes.

Agreed. The other reviewer likewise raised this concern and we provide the same response here. In the revised manuscript we include an Alpine3D simulation for the year 2015 without horizontal snow redistribution (see newly added Fig. 10). In the revised manuscript, we discuss the effect of simulated snow redistribution on simulated SMB variability, over variability caused by other processes (see newly added Section 3.7, L397-405).

I.265: It would be interesting if the authors could present how the process of wind-driven compaction is modeled in Alpine3D. For example, are the properties of deposited snow prescribed? Or do they depend on the properties of the previously eroded snow?

This is an appropriate request and in line with a question from Reviewer 2. In order to answer your question as well as improve the readability of the manuscript, we have added the following text (see L164-168):

“Following erosion and subsequent redeposition, several snow microstructural properties are updated in SNOWPACK according to the "redeposit" scheme presented in Keenan et al., 2021. For example, the density of redeposited snow layers are parameterized according to wind speed (Eq. 4 in Keenan et al., 2021) while sphericity and dendricity are both set to 0.875. The grain radius and bond radius are set to 0.2 mm and 0.05 mm, respectively while albedo is defined by Eq. 7 in Groot Zwaaftink et al. (2013).”

Although certainly of some interest to this paper, because these developments have been published elsewhere, we believe that the full details of SNOWPACK's microstructural implementation are best left out of this manuscript. For this reason, we refer readers to Keenan et al. (2021) and Groot Zwaaftink et al. (2013) for further explanation.

I.317: The definition of SMB is not very clear in the Conclusions. The definition presented in the Introduction is more accurate. Please consider rephrasing.

Good suggestion. Notably, this comment is consistent with the other reviewer's suggestion. We have revised to (see L408):

“The primary way ice sheets accumulate mass is through net snow accumulation at the ice sheet surface. SMB quantifies the balance between processes which accumulate and ablate mass at the surface of ice sheets.”

#### **Technical corrections:**

I.44: The word "recent" is doubled.

Fixed. Thank you (see L63).

I.64-67: I suggest referring to the respective sections as in lines 60-64.

Good catch. Implemented (see L92-93).

I.69: I suggest revising the need for section 2.1. The content of this section is mainly an introductory paragraph of section 2. Hence, it can be included below the title "Methods" without the need for a new subsection.

Thank you for the suggestion. After careful consideration, we have decided to keep the subsection title as we believe it will be useful in guiding readers who are interested in finding a quick methodological summary.

Figure 1: It would be interesting to add the remaining applications to the scheme (e.g. Meteolo, WindNinja, ICESat-2, MERRA-2).

Thank you for this suggestion, which we incorporated in the updated Figure 1.

I.91: Consider replacing "off" by "on".

Fixed. Thank you (see L121).

I.100: Consider replacing "cheaper" by "computationally lighter".

Good feedback, thank you. We have updated it to "computationally cheaper" (see L130).

I.120: Consider replacing "layers" by "snow layers".

Implemented. Thank you (see L151).

I. 135: Taking into account that Alpine3D is more than a wind redistribution module, this title might mislead the reader. Consider removing "Alpine3D:".

Agreed, even though we still think it is important to make clear at this point that the section describes the workings of Alpine3D. Therefore, we have rephrased the subsection header to: "Numerical treatment of deposition and erosion in Alpine3D" (see L191).

I.165: I suggest considering the option of moving subsections 2.5-2.7 to a new section. It can be called "Case Study", for example.

Thanks for bringing this idea to our attention. Although these three sections could certainly be considered descriptive of a single case study, we believe that they provide unique information that benefits from their granular heading. For this reason, we respectfully keep the 2.5 – 2.7 subsections.

I.184: Even though the meaning of "efficiency" is clear in the text, please keep in mind that it has a specific meaning in high performance computing (see parallel efficiency).

Good point. To avoid confusion, we have revised to "computational speed" (see L259).

I.184: I suggest writing all numbers in a consistent way: either delete the comma in number 27126 (I.182) or add it in number 1130 (1,130).

Good point. We now use commas in both cases (see L259).

I.185 and 187: Taking into account that Alpine3D includes SNOWPACK, I believe it is not very precise to talk about "SNOWPACK and Alpine3D" in this context. Consider replacing by Alpine3D only.

Thanks. We have adopted this suggestion (see L259 and L261).

I.187: Considering replacing "cheaper". What about "computationally less expensive"?

We have adopted your suggestion and replaced "cheaper" with "computationally less expensive" (see L262). Thanks for pointing out this opportunity for improved clarity.

I.232: The word "decreasing" is misspelled.

Fixed. Thank you.

I.243: It is not very clear what is the "2015-2020 period" and the "long term average". Please consider rephrasing.

Good point, we are now more explicit after revising to (see L320-323):

"Furthermore, it is worth noting that over the length of the transect, MERRA-2 2015-2020 mean annual SMB exceeds that of observations (504 and 461mm w.e. yr<sup>-1</sup>), indicating that the 2015-2020 simulated SMB exceeded the 1980-2017 MERRA-2 mean annual SMB (Section 2.7)."

I.268: Is it R or R-squared?

Indeed it is R. We report R instead of R-squared to make clear the positive correlation.

I.339: Consider adding "that" after "shown".

Added (see L430).

I.347-348: Did the authors consider adding the model to the gitlab of Alpine3D?

Thank you for the suggestion. Although certainly worth considering, we have decided not to because we have already made our version entirely open source (<https://github.com/snowpack-model/snowpack/tree/driftingsnow>) and we do not control the SLF gitlab source repository.

**Reference used here, but not cited in manuscript:**

Groot Zwaaftink, C. D., Mott, R., and Lehning, M. (2013b), Seasonal simulation of drifting snow sublimation in Alpine terrain, *Water Resour. Res.*, 49, 1581– 1590, doi:[10.1002/wrcr.20137](https://doi.org/10.1002/wrcr.20137).

# A wind-driven snow redistribution module for Alpine3D v3.3.0: Adaptations designed for downscaling ice sheet surface mass balance

Eric Keenan<sup>1</sup>, Nander Wever<sup>1,2</sup>, Jan T. M. Lenaerts<sup>1</sup>, and Brooke Medley<sup>3</sup>

<sup>1</sup>Department of Atmospheric and Oceanic Sciences, University of Colorado, Boulder, CO, USA

<sup>2</sup>WSL Institute for Snow and Avalanche Research SLF, Davos, Switzerland

<sup>3</sup>Cryospheric Sciences Laboratory, NASA Goddard Space Flight Center, Greenbelt, MD, USA

**Correspondence:** Eric Keenan (eric.keenan@colorado.edu)

**Abstract.** Ice ~~sheets gain mass via sheet surface mass balance describes the net~~ snow accumulation at the ice sheet surface, ~~which is the primary component of surface mass balance.~~ On the Antarctic ice sheet, winds redistribute snow resulting in surface mass balance that is variable in both space and time. Representing wind-driven snow redistribution processes in models is critical for local assessments of surface mass balance, repeat altimetry studies, and interpretation of ice core accumulation records. To this end, we have adapted Alpine3D, an existing distributed snow modeling framework, to downscale Antarctic surface mass balance to horizontal resolutions up to 1 km. In particular, we have introduced a new two-dimensional advection-based wind-driven snow redistribution module that is driven by an offline coupling between WindNinja, a wind downscaling model, and Alpine3D. We then show that large accumulation variability can be at least partially explained by terrain-induced wind speed variations which subsequently redistribute snow around rolling topography. By comparing Alpine3D to airborne-derived snow accumulation measurements within a testing domain over Pine Island Glacier in West Antarctica, we demonstrate that our Alpine3D downscaling approach improves surface mass balance estimates when compared to MERRA-2, a global atmospheric reanalysis which we use as atmospheric forcing. In particular, when compared to MERRA-2, Alpine3D reduces simulated surface mass balance root mean squared error by 23.4 mm w.e.yr<sup>-1</sup> (13%) and increases variance explained by 24%. Despite these improvements, ~~Alpine3D still underestimates observed accumulation variability, thus providing an opportunity for future model improvement.~~

our results demonstrate that considerable uncertainty stems from the employed saltation model, confounding simulations of surface mass balance variability.

## 1 Introduction

Ice sheet surface mass balance (SMB) is the difference between mass accumulation and ablation processes at the surface of ice sheets (Lenaerts et al., 2019). Mass accumulation is composed of precipitation as well as condensation and deposition of atmospheric water vapor, whereas ablation processes remove mass from the ice sheet surface via meltwater runoff, both atmospheric and surface sublimation, and evaporation. Additionally, local SMB is influenced by ~~drifting (lowest 2 of the atmosphere) and blowing (above 2) snow, which together~~ the process of wind-driven snow redistribution, which we refer to as deposition in the case of net-local mass gain and erosion in the case of mass loss (Lenaerts and van den Broeke, 2012).

25 Wind-driven snow redistribution is generally divided into two categories, drifting snow, where snow particles are transported by the wind in the lowermost 2 m of the atmosphere, and blowing snow where snow is redistributed at heights greater than 2 m.

Drifting and blowing snow have been shown to have a substantial effect on Antarctic SMB spatial variability at scales ranging from tens of kilometers (Dattler et al., 2019; Kausch et al., 2020) to meters (Picard et al., 2019). In fact, both Dattler et al. (2019) and Picard et al. (2019) have shown that local deposition can exceed annual precipitation. In addition to redistributing mass, drifting and blowing snow contribute to mass loss by promoting enhanced sublimation as snow particles are entrained in the lower atmosphere (Palm et al., 2017). In spite of drifting and blowing snow sublimation being a source of mass loss, evaluation of model simulation of these processes remains difficult (Amory et al., 2021). The net effect of drifting and blowing snow is preferential deposition in areas of mass convergence at the expense of areas with net divergence (Lehning et al., 2008).  
35 Despite our lack of complete physical understanding of the processes which govern preferential deposition at small spatial and temporal scales (Comola et al., 2019b), deposition and erosion can be conceptually summarized as the local convergence of previously eroded snow particles from upwind minus locally eroded snow (Liston et al., 2007). Local erosion is governed by the direct competition between forces that act to erode snow and those which act to anchor snow to the ice sheet surface. Erosive forces, namely surface wind stress, are controlled by atmospheric boundary layer processes (Paterna et al., 2016) (Paterna et al., 2016; Comola et al., 2019a), while cohesive forces are controlled by snow-microstructural properties including grain size and bond strength (Clifton et al., 2006) (Clifton et al., 2006; Melo et al., 2022). This interplay between boundary layer and snow-microstructural processes has historically motivated the development of tightly coupled atmospheric and land surface snow models (e.g., Lawrence et al., 2019; Amory et al., 2021; Sharma et al., 2023).

When the combined effect of surface wind stress and impact force from saltating particles exceeds cohesive forces at the snow surface, saltation of snow particles is initiated or maintained within the lowermost 10 cm of the atmosphere (Pomeroy and Gray, 1990) (Schmidt, 1980; Pomeroy and Gray, 1990). Within the saltation layer, ~~which is generally assumed to account atmospheric momentum is entrained by snow particles which eventually collide with and subsequently mobilize additional particles at the snow surface.~~ Above the saltation layer, a suspension layer can be present where turbulent eddies generate sufficient upward lift forces that can keep particles afloat against gravity (e.g., Bintanja, 2000). Measurements from Antarctica show that particles in suspension are typically much smaller than those that are transported in saltation (Nishimura and Nemoto, 2005). Correspondingly, mass densities in the suspension layer are found to be orders of magnitude smaller than in the saltation layer. However, with increasing wind speed, the suspension layer can grow orders of magnitude larger than the height of the saltation layer, leading to estimates that the largest part of total mass transport during high wind speed events could be carried in the suspension layer (Pomeroy and Male, 1992; Liston and Sturm, 1998; Mann, 1998). It is difficult to quantify the contribution of suspension to total mass transport on average, with some authors arguing that saltation accounts for 50 – 75% of total wind-driven mass transport (Gromke et al., 2014), ~~atmospheric momentum is entrained by snow particles which eventually collide with and subsequently mobilize additional particles at.~~ However, although deposition and erosion are ubiquitous across much of the Antarctic ice sheet, it is possible that local SMB variability is primarily driven by a small number of high wind speed events which occur only a few times per year.



60 [Nevertheless, the interaction between wind transport of snow and the snow surface](#) ~~As is governed by the saltation layer. As~~  
[saltating](#) particles break apart upon collision [with the surface](#), snow grain fragmentation and rounding are observed, resulting  
in increased density (~~Vionnet et al., 2012~~) ([Vionnet et al., 2012](#); [Amory et al., 2021](#)) in a processes referred to as drifting-snow  
compaction. Reliable model representation of drifting-snow compaction is now particularly attractive owing to recent ~~recent~~  
65 advancements in satellite altimetry technology (e.g. CryoSat-2 and ICESat-2). Vertical accuracy, spatial resolution, and ground  
track repeat frequency have all increased, providing precise measurements of ice sheet surface height change (Smith et al.,  
2020). However, in order to reliably convert these height changes into mass, particularly over short time scales, we rely on  
accurate snow and firn density estimates from models (The IMBIE team, 2018). Thus, to confidently assign subtle observed  
changes in height to quantifiable changes in mass, our models must capture the complex spatial and temporal patterns of  
deposition and erosion.

70 Current state-of-the-art firn densification models, which are used to convert satellite observed volume changes into mass,  
successfully capture broad regional variability in firn properties, including density (Ligtenberg et al., 2011; Medley et al.,  
2022b). However, because of the relatively coarse horizontal resolutions at which they are applied (5.5 – 35 km), these models  
are unable to represent spatial variability in firn processes, including deposition and erosion, at the horizontal scales now  
sampled by satellites (< 1 km). This spatial gap between satellite observations and firn densification models may not be  
75 immediately important for mass balance retrievals at continental scales (Verjans et al., 2021). Nevertheless, improved model  
representation of wind-driven snow redistribution at finer spatial scales can be used to constrain regional to local surface mass  
balance (Rignot et al., 2011), improve volume-to-mass conversions for repeat altimetry (Shepherd et al., 2012; Zwally et al.,  
2015), provide the ice coring and radar communities with a mechanism to select representative sampling locations for SMB  
reconstructions (Kausch et al., 2020), and inform future studies by providing baselines to estimate sublimation of drifting and  
80 blowing snow.

To facilitate local SMB estimates and reconstructions as well as repeat altimetry interpretation, we present a new technique  
for dynamically downscaling Antarctic SMB by building upon the existing Alpine3D v3.3.0 model framework (Section 2.1).  
~~In particular~~ [Alpine3D already contains a module for the 3D treatment of drifting and blowing snow \(Lehning et al., 2006\), but](#)  
[its use requires 3D wind fields at high temporal resolution from an external source, and it is computationally very demanding to](#)  
85 [run. This motivates the current study to find a simpler, and therefore computationally lighter method to describe wind transport](#)  
[by snow, particularly since the fully 3D approach also does not guarantee good agreement between simulated and observed](#)  
[snow depth in severely wind affected areas \(Mott et al., 2008, 2010; Gerber et al., 2017\). To this end](#), we describe the use of  
WindNinja to downscale wind fields onto local topography (Section 2.2), and demonstrate the use of a one-dimensional snow  
model to diagnose local erosion (Section 2.3) and then distribute this mass horizontally across adjacent grid cells using a  
90 new, two-dimensional advection-based redistribution module (Section 2.4). We then present downscaling results at 1 and 3 km  
horizontal resolution, and evaluate the added value by quantitatively comparing our results, along with a global SMB product,  
to a 130 km long airborne radar derived SMB transect in interior West Antarctica over Pine Island Glacier ([Sections 3.1 - 3.2,](#)  
[3.5](#)).

## 2 Methods

### 95 2.1 Alpine3D: Surface mass balance downscaling framework

We use and further develop the existing Alpine3D v3.3.0 model framework (Lehning et al., 2006) to downscale Antarctic SMB processes to a target horizontal resolution of up to 1 km. At its core, the model framework exploits the MeteoIO library (Bavay and Egger, 2014) to handle meteorological preprocessing and downscaling (Section 2.2), SNOWPACK (Bartelt and Lehning, 2002; Lehning et al., 2002b, a), a physics-based land-surface snow model for the detailed description of snow microstructural properties (Section 2.3), and a new module to calculate horizontal mass fluxes between adjacent grid cells (sections 2.4 and 100 2.6, Fig. 1).

### 2.2 Atmospheric forcing: Meteorological downscaling

At the snow surface, we prescribe hourly MERRA-2 global atmospheric reanalysis (Gelaro et al., 2017) which we have down- scaled to the Alpine3D grid using the MeteoIO preprocessing and downscaling library (Bavay and Egger, 2014). These down- 105 scaled time series include: 2 m air temperature, relative humidity, incoming shortwave and longwave radiation (ISWR and ILWR), precipitation rate, and 10 m wind speed and direction. 2 m air temperature is first downscaled to the Alpine3D grid using an ordinary kriging algorithm with a lapse rate of  $-6 \text{ }^\circ\text{C km}^{-1}$  [designed to capture a typical atmospheric lapse rate \(Martin and Peel, 1978\)](#) while relative humidity is spatially interpolated according to Liston and Elder (2006). Precipitation rate and ISWR are then interpolated using inverse distance weighting, with ISWR undergoing a simple correction for slope and topographic shading (Helbig, 2009). ILWR is interpolated by first calculating the hourly average of all MERRA-2 grid 110 cells within the domain, and then applying a constant lapse rate of  $-31.25 \text{ W m}^{-2} \text{ km}^{-1}$ . ~~At the bottom of the firn column, we~~ [\(Michel et al., 2022\). We follow Keenan et al. \(2021\), by applying the MERRA-2 mean annual surface temperature as a Dirichlet thermodynamic boundary condition at the bottom of the firn column. This assumption is supported by observations from the dry snow zone of the Greenland ice sheet, where differences between mean annual air temperature and firn temperature at 10m were found to be typically within a few tenths of a degree \(Alley and Koci, 1990\). Ligtenberg \(2014\) also shows in a model result that the seasonal cycle in firn temperature disappears around 10m depth.](#) Note that for all topographic calculations, we use an ICESat-2 derived digital elevation model (DEM) (Medley et al., 2022a).

Because reliable simulations of deposition and erosion require accurate wind speed and direction fields (Reynolds et al., 2021), we test two approaches for downscaling wind speed and direction from the relatively coarse ( $0.5^\circ$  latitude  $\times$   $0.625^\circ$  120 longitude) MERRA-2 grid. First, we apply the terrain-based index method proposed by Liston et al. (2007) which adjusts wind speed and direction based ~~off on~~ topographic exposure and sheltering. Note that we use the default slope and curvature weighting factors and choose a topographic length scale of 5 km. However, because Reynolds et al. (2021) showed that simulated snow depth better captured observations when forced with WindNinja downscaled wind fields (Forthofer et al., 2014) compared to the relatively simpler terrain-based index methods presented in Liston et al. (2007), we have implemented 125 WindNinja (Version 3.7.1) as an alternative offline wind speed and direction downscaling technique within the Alpine3D modeling framework. WindNinja is a finite element diagnostic model which leverages a mass-conservation solver and DEM

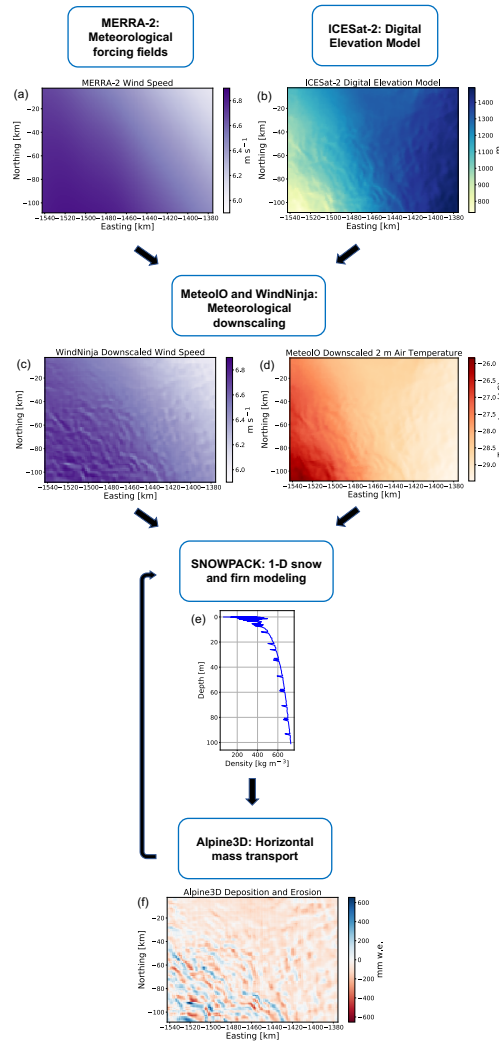

**Figure 1.** Anatomy of an Alpine3D time step: Hourly global atmospheric reanalysis (a) is combined with ICESat-2 derived surface topography (b) to calculate downscaled meteorology (c, d) at each SNOWPACK model grid cell. The SNOWPACK model is then used to calculate snow microstructural properties at each grid cell (e). Finally, the Alpine3D model is used to calculate horizontal mass transport across adjacent grid cells (f) which is then sent back to SNOWPACK for the next time step. Note that in (c, d), downscaled wind speed and 2 m air temperature are shown as an example, while also relative humidity, incoming shortwave and longwave radiation, precipitation rate, and 10 m wind direction are downscaled (see text).

to simulate the mechanical effects of terrain on the flow. In terms of WindNinja model configuration, we have selected the "fine" finite element mesh resolution and chosen "grass" as our surface roughness category (snow is not currently an option). Despite representing a significant increase in complexity compared to other terrain-based interpolation techniques (e.g., Liston et al., 2007), WindNinja is still significantly computationally cheaper than high-resolution numerical weather models (e.g.

the Weather Research and Forecasting (WRF) Model), which solve the non-hydrostatic, fully compressible Navier-Stokes equations at multiple vertical levels (Wagenbrenner et al., 2016), and can therefore be run with reasonable computational resources (Section 2.6).

### 2.3 SNOWPACK: One-dimensional physics-based snow model

135 We use SNOWPACK, a physics-based land-surface snow model, to describe one-dimensional snow and firn processes at each Alpine3D grid cell. SNOWPACK was originally developed for avalanche warning applications, and has been continuously enhanced in order to represent various cryospheric processes including seasonal snow (Sharma et al., 2023), sea ice snow cover (Wever et al., 2020), and polar firn compaction (Groot Zwaaftink et al., 2013; Keenan et al., 2021). In this study, we use the SNOWPACK physics presented in Keenan et al. (2021), with one exception being a new parameterization for surface  
140 roughness length,  $z_0$  (m), Eq. (1), tuned to observed seasonal variability between winter and summer surface roughness in coastal East Antarctica (Amory et al., 2017). In Eq. (1),  $\kappa$  is the von Kármán constant (0.4),  $T_{2\text{ m}}$  is the 2 m air temperature ( $^{\circ}\text{C}$ ), and  $C_{\text{DN}10}$  is the neutral drag coefficient at 10 m, Eq. (2).

$$z_0 = \begin{cases} \frac{10}{\exp\left(\frac{\kappa}{\sqrt{C_{\text{DN}10}}}\right)} & T_{2\text{m}} > -20\text{ }^{\circ}\text{C} \\ 0.0002 & T_{2\text{m}} \leq -20\text{ }^{\circ}\text{C} \end{cases} \quad (1)$$

$$C_{\text{DN}10} = 2.7 \times 10^{-3} + 9.0 \times 10^{-5} T_{2\text{m}} + 1.5 \times 10^{-6} T_{2\text{m}}^2 \quad (2)$$

145 In SNOWPACK, snow redistribution is initiated when the friction velocity  $u_*$  ( $\text{m s}^{-1}$ ) exceeds the surface threshold friction velocity  $u_{*\text{th}}$  ( $\text{m s}^{-1}$ , Eq. (3)), which is calculated diagnostically as a function of snow microstructural properties including snow grain sphericity  $SP$  (0 - 1), radius  $r_g$  (m), bond radius  $r_b$  (m), and coordination number  $N_3$  (Lehning and Fierz, 2008).

$$u_{*\text{th}} = \sqrt{\frac{A\rho_i g r_g (SP + 1) + B\sigma N_3 \frac{r_b^2}{r_g^2}}{\rho_a}} \quad (3)$$

In Eq. (3),  $\rho_i$  is the density of ice ( $917\text{ kg m}^{-3}$ ),  $\rho_a$  is the density of air ( $1.1\text{ kg m}^{-3}$ ),  $g$  is the gravitational acceleration  
150 ( $9.8\text{ m s}^{-2}$ ),  $\sigma$  is a reference shear strength set to  $300\text{ Pa}$ , while constants  $A$  and  $B$  are set to 0.02 and 0.0015 respectively. Once drifting snow is initiated, snow layers are eroded from the top of the simulated snow cover until the saltation mass flux  $\Phi$  (transport rate  $Q$  ( $\text{kg m}^{-1}\text{ s}^{-1}$ ), Eq. (4)) is satisfied. These eroded layers are then made available to Alpine3D for horizontal redistribution across adjacent grid cells (Section 2.4). In Eq. (4),  $L$  is, is satisfied (Sørensen, 1991). The required local erosion is calculated from  $Q$  by scaling to an erosion mass flux  $\Phi$  ( $\text{kg m}^{-2}\text{ s}^{-1}$ ) by dividing  $Q$  by a characteristic horizontal length  
155 scale  $L$ , which we call the fetch length, over which the saltating particles in  $\Phi$  are scaled to calculate local erosion  $\Phi$  from the firn layer.  $L$  can be conceptually understood to represent the distance over which the originally upwind and now saltating

particles have been eroded from the snow surface (Keenan et al., 2021). These eroded snow layers are then made available to Alpine3D for horizontal redistribution across adjacent grid cells (Section 2.4).

$$\Phi = \frac{Q}{L} = \frac{0.0014\rho_a u_* (u_* - u_{*th})(u_* + 7.6u_{*th} + 205)}{L} \quad (4)$$

160 In contrast to our previous study (Keenan et al., 2021), we revert  $L$  from 10 m back to the original SNOWPACK value of 70 m. We make this choice because Alpine3D simulations with a fetch length of 30 m or less were found to significantly overestimate the magnitude of deposition and erosion when compared to observations (Section 3.6). However, because we are not aware of any direct observations,  $L$  can be effectively considered a tuning parameter whose magnitude is inversely proportional to the amount of eroded mass accounted for in the saltation mass flux  $\Phi$  (Wever et al., 2022). Following erosion and subsequent redeposition, several snow microstructural properties are updated in SNOWPACK according to the "redeposit" scheme presented in (Keenan et al., 2021). For example, the density of redeposited snow layers are parameterized according to wind speed (Eq. 4 in Keenan et al. (2021)) while sphericity and dendricity are both set to 0.875. The grain radius and bond radius are set to 0.2 mm and 0.05 mm, respectively while albedo is defined by Eq. 7 in Groot Zwaaftink et al. (2013).

Note that we do not explicitly account for blowing snow suspension in our model. We make this pragmatic decision primarily for the three following reasons: 1) because full prognostic solution of blowing snow transport via suspension requires numerically expensive calculations using wind vector fields at multiple vertical levels (Sharma et al., 2023), 2) (e.g., Lehning et al., 2006; Sørensen et al., 2010) while we discussed before that few observational case studies would be available for validation that quantitatively partition between saltation and suspension-driven transport and their eventual effect on deposition and erosion, and 3) It is also important to consider that the control provided by the poorly constrained fetch length  $L$  can be tuned such that the saltation mass flux  $\Phi$  naively accounts for mass fluxes from both saltation and suspension (Keenan et al., 2021) would make it possible to locally erode more snow, which naively could be thought of as considering a suspension layer (Keenan et al., 2021), even though the advection distance of snow in suspension is larger given the higher advection speeds and longer airborne times of suspended particles.

180 Additionally, it has come to our attention that SNOWPACK's parameterization of  $Q$  does not perfectly match the original parameterization proposed by Sørensen (1991). As noted in Vionnet (2012), the parameters 0.0014 and 205 in Eq. 4 reflect units for  $Q$  of  $\text{g cm}^{-1} \text{s}^{-1}$ , whereas here we define  $Q$  with units of  $\text{kg m}^{-1} \text{s}^{-1}$ . This implementation error in SNOWPACK was introduced by Lehning and Fierz (2008), but since we build upon the previous work by Keenan et al. (2021); Wever et al. (2022), who showed satisfying results for erosion and deposition calculated using the currently implemented code, we did not correct this error. Practically speaking, this error leads SNOWPACK to underestimate the magnitude of  $Q$  compared to the intended parameterization described in Sørensen (1991). However, it is also important to note here that  $Q$  is ultimately scaled by the poorly constrained tuning parameter  $L$ , such that any changes in the formulation of  $Q$  could require a new choice for the fetch length  $L$  to maintain similarly good performance. Thus, it is not certain that updating our parameterization of  $Q$  would lead to improved or more physically meaningful results. That said, future studies could consider using the updated parameterization

of  $Q$  introduced in Sørensen (2004) which Vionnet (2012) showed to produce similar results to our presently dimensionally  
 190 incorrect parameterization of  $Q$  (Vionnet et al., 2014).

## 2.4 **Alpine3D:** Numerical treatment of deposition and erosion in Alpine3D

At each time step, the saltation mass flux  $\Phi$  (see Eq. (4)) at each grid cell is scaled to a saltation mass  $M_s$  ( $\text{kg m}^{-2}$ ) by multiplying  $\Phi$  by the Alpine3D time step  $\Delta t_{\text{A3D}}$  (s) (Eq. (5)).

$$M_s = \Phi \Delta t_{\text{A3D}} \quad (5)$$

195  $M_s$  is then made available to Alpine3D for downstream redistribution **by the wind**, resulting in a local saltation mass perturbation  $\Delta M_s$  ( $\text{kg m}^{-2}$ ) which is positive in the case of net deposition and negative in the case of erosion. We calculate  $\Delta M_s$  by treating wind-driven snow redistribution as a two-dimensional horizontal advection problem (Eq. (6)) where  $\mathbf{u}_s$  is the saltation velocity vector ( $\text{m s}^{-1}$ ). In our implementation,  $\mathbf{u}_s$  represents the saltation particle speed and is defined as parallel to the 10 m wind speed unit vector  $\hat{\mathbf{U}}_{10 \text{ m}}$  with a magnitude parameterized as a function of  $u_{*\text{th}}$  (Eq. (7)) according to Pomeroy and Gray  
 200 (1990).

$$\frac{\partial M_s}{\partial t} + \mathbf{u}_s \cdot \nabla M_s = 0, \quad (6)$$

$$\mathbf{u}_s = 2.8 u_{*\text{th}} \hat{\mathbf{U}}_{10 \text{ m}} \quad (7)$$

We solve for  $\Delta M_s$  by numerically integrating Eq. (6) forward in time using a first-order accurate, upwind finite difference scheme with an adaptive sub-time step  $\Delta t_{\text{CFL}}$  (s) in order to ensure numerical stability under the Courant-Friedrichs-Lewy  
 205 (CFL) condition (Courant et al., 1928). The local saltation mass perturbation at the  $i^{\text{th}}$  sub-time step originating from advection of saltating snow in the  $\hat{x}$  and  $\hat{y}$  directions  $\delta M_{s,x}^i$ ,  $\delta M_{s,y}^i$  ( $\text{kg m}^{-2}$ , Eqs. (8) and (9)), are then calculated with  $\Delta X$  being the Alpine3D horizontal grid resolution.

$$\delta M_{s,x}^i = \begin{cases} \frac{(M_{s(x-1,y)} - M_{s(x,y)})}{\Delta X} (\mathbf{u}_s \cdot \hat{x}) \Delta t_{\text{CFL}} & (\mathbf{u}_s \cdot \hat{x}) > 0 \\ \frac{(M_{s(x,y)} - M_{s(x+1,y)})}{\Delta X} (\mathbf{u}_s \cdot \hat{x}) \Delta t_{\text{CFL}} & (\mathbf{u}_s \cdot \hat{x}) < 0 \end{cases} \quad (8)$$

$$\delta M_{s,y}^i = \begin{cases} \frac{(M_{s(x,y-1)} - M_{s(x,y)})}{\Delta X} (\mathbf{u}_s \cdot \hat{y}) \Delta t_{\text{CFL}} & (\mathbf{u}_s \cdot \hat{y}) > 0 \\ \frac{(M_{s(x,y)} - M_{s(x,y+1)})}{\Delta X} (\mathbf{u}_s \cdot \hat{y}) \Delta t_{\text{CFL}} & (\mathbf{u}_s \cdot \hat{y}) < 0 \end{cases} \quad (9)$$

210  $\Delta t_{\text{CFL}}$  is optimized such that we choose the maximum possible sub-time step while simultaneously satisfying the CFL condition (Eq. (10)).

$$(|\mathbf{u}_s \cdot \hat{x}| + |\mathbf{u}_s \cdot \hat{y}|) \frac{\Delta t_{\text{CFL}}}{\Delta X} < 1 \quad (10)$$

Note that in the case of the final sub-time step, we reduce  $\Delta t_{\text{CFL}}$  such that the sum of all  $N$  sub-time steps is equal to  $\Delta t_{\text{A3D}}$ . By summing equations 8 and 9 across all  $\Delta t_{\text{CFL}}$  within  $\Delta t_{\text{A3D}}$ , we are able to finally calculate the local saltation mass  
 215 perturbation  $\Delta M_s$  ( $\text{kg m}^{-2}$ , Eq. (11)) which is ultimately sent to SNOWPACK as a mass flux available at the next time step.

$$\Delta M_s = \sum_{i=1}^N (\delta M_{s,x}^i + \delta M_{s,y}^i) \quad (11)$$

Our upwind finite difference scheme cannot be applied at the edges of a domain, therefore we must prescribe boundary conditions. In this application (Section 2.5) we simulate a finite spatial domain. In order to force our domain to behave more like an infinite domain, we implement periodic boundary conditions (Hames et al., 2022) which implies that deposition and  
 220 erosion integrate to zero throughout the modeling domain. In areas where a net blowing snow mass influx or outflux with respect to the model domain may occur, for example in coastal regions where mass can be lost to the ocean, as well as in areas with steep topography, this assumption is not expected to hold. However, note that establishing boundary conditions for a blowing snow model in such areas would be very challenging. As discussed before, we may underestimate the effects of snow transport by wind by neglecting the dynamics of the suspension layer, including vertical advection of particles between the saltation and suspension layer, which may impact spatial variability in SMB. Similarly, small scale atmospheric processes, like orographic lifting at scales not represented in the forcing data (Lenaerts et al., 2014), as well as complex flow patterns that can occur in steep terrain (Gerber et al., 2017), may create larger variability in SMB than we can simulate with our approach.  
 225 Furthermore, we note that our model currently makes a significant simplification by not considering sublimation of snow particles actively entrained in the atmosphere above the snow surface (Amory et al., 2021).

## 230 2.5 Pine Island Glacier experimental domain

As a demonstration of our Alpine3D downscaling framework, we define a  $198 \text{ km} \times 137 \text{ km}$  modeling domain centered over the Pine Island Glacier basin in West Antarctica (Fig. 2a, red rectangle). In this domain, surface elevations range from approximately 700–1500 m leading to relatively large surface slopes (mean:  $0.64^\circ$ , 10% quantile:  $0.18^\circ$ , 90% quantile:  $1.3^\circ$ ) typical of the Antarctic escarpment zone. Strong and steady winds driven by consistent katabatic forcing, combined with rolling  
 235 topography, have been shown to drive SMB variability of up to a factor of five ( $200\text{--}1000 \text{ mm w.e.yr}^{-1}$ ) over horizontal scales on the order of 10 km (Dattler et al., 2019). In fact, Dattler et al. (2019) found the largest SMB spatial variability among their 17,500 km of flight line measurements in this domain (Section 2.7). This region therefore provides an opportunity to evaluate our SMB downscaling framework, while still being of modest spatial extent and therefore acceptable computational cost necessary for continuous model development. ~~In terms of model initialization, we borrow from~~

240 We initialize the model based on the approach employed in our previous study , ~~Keenan et al. (2021), by initializing each~~  
~~Alpine3D grid cell with a 100 thick firn column whose properties are uniquely determined by running~~ (Keenan et al., 2021)  
~~,~~ where good performance for density and temperature was obtained. For each MERRA-2 grid point (Section 2.2) inside the  
domain, we repeatedly ran a one-dimensional SNOWPACK simulation (Section 2.3) ~~with atmospheric forcing taken from the~~  
~~nearest~~ for the period 1980–2017, while for every iteration taking the simulated firn layer by the end of 2017 as initial conditions  
245 at the start of 1980. Those spin-up simulations describe the impact of drifting snow on the surface density and microstructure  
(Keenan et al., 2021; Wever et al., 2022), but they do not consider spatial snow redistribution. The process was repeated until  
the firn layer was at least 100 m deep by the end of 2017. We then ran one final simulation from January 1, 1980 until January 1,  
2015. Afterward, each Alpine3D model grid point was initialized using the firn properties from the closest MERRA-2 grid cell  
~~(Section 2.2)~~ point SNOWPACK simulation. Alpine3D downscaling is then launched at the beginning of the analysis period  
250 (2015 in this study), meaning that although we initialize Alpine3D with a spun up firn column, its properties initially reflect the  
non-downscaled MERRA-2 climate. Note that in order to minimize the relative importance of boundary conditions for drifting  
snow, upon analysis we remove all grid cells within 15 km of the four domain boundaries, resulting in grid size of 168 km ×  
107 km (Fig. 2b black dashed rectangle).

## 2.6 Computational parallelization and benchmarking

255 To enable efficient numerical parallelization, the Alpine3D modeling framework supports a hybrid OpenMP/MPI implemen-  
tation. For benchmarking, we perform calculations on a 1 km horizontal resolution 27,126 km<sup>2</sup> domain (Section 2.5) using  
general purpose compute nodes with 24 parallel CPUs per node. In the case of offline WindNinja wind speed and direc-  
tion downscaling, we use 1 node (OpenMP, 24 CPUs) for 1 hour per calendar year, resulting in ~~an efficiency of 1130 a~~  
~~computational speed of 1,130~~ km<sup>2</sup> yr (CPU hr)<sup>-1</sup>. Whereas for ~~SNOWPACK and~~ Alpine3D caclulations, we leverage 4  
260 nodes (hybrid OpenMP/MPI, 96 total CPUs) for 18 hours per calendar year, netting ~~an efficiency a computational speed~~  
of 16 km<sup>2</sup> yr (CPU hr)<sup>-1</sup>. WindNinja is therefore at least one order of magnitude ~~cheaper than combined SNOWPACK and~~  
~~computationally less expensive than~~ Alpine3D, meaning that its added complexity is justified if downscaled SMB estimates  
are significantly improved.

## 2.7 Surface mass balance observations

265 To evaluate our SMB downscaling, we compare with a 130 km long, radar-derived accumulation transect (Fig. 2b black line  
T-T\*) developed by Dattler et al. (2019). This annual-averaged snow accumulation product captures spatial variability in along-  
track accumulation by tracking fluctuations in radar-derived firn isochrone thickness. Horizontal variations in thickness are then  
converted to mass using the Herron and Langway (1980) firn density model. At 25 km horizontal resolution, Dattler et al. (2019)  
set the mean annual (1980–2017) accumulation to that of MERRA-2 atmospheric reanalysis. While at smaller scales, accumu-  
270 lation is modified by the combination of firn isochrone thickness and simulated firn density. This product intends to represent  
the annual-average SMB. However, because of the finite thickness of firn isochrones and spatially variable accumulation rates,



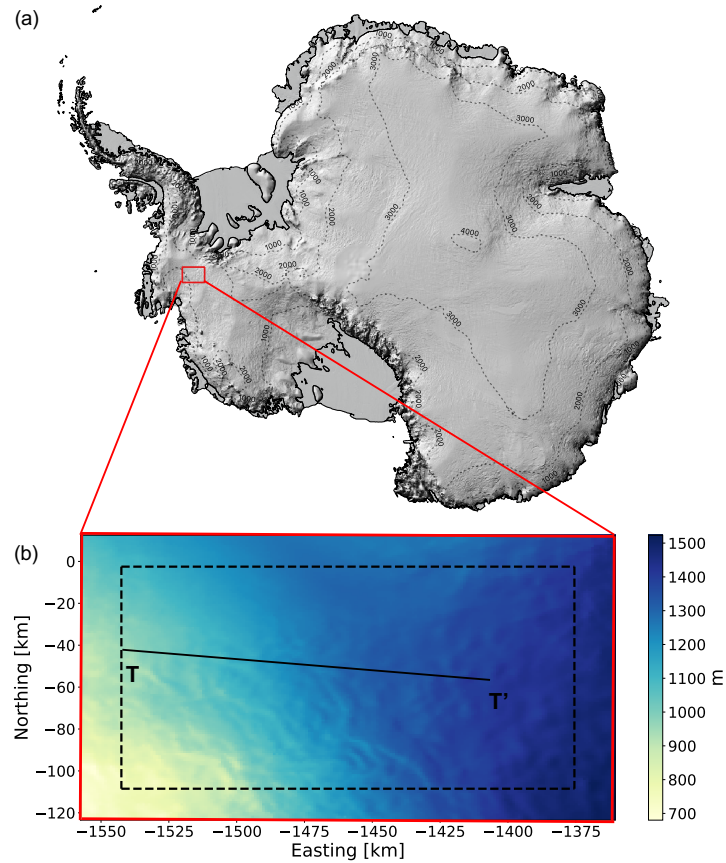

**Figure 2.** Alpine3D modeling and analysis domains in the EPSG 3031 coordinate system: (a) The  $198 \text{ km} \times 137 \text{ km}$  Alpine3D modeling domain (red rectangle) is centered over the Pine Island Glacier basin in West Antarctica. (b) Surface topography of Alpine3D modeling (red) and analysis (black dashed) domains with the location of the 130 km observed SMB transect (black line, T-T'). Panel (a) was created using the Norwegian Polar Institute's Quantarctica package (Matsuoka et al., 2018).

the annual average is calculated over varying periods depending on the location. No quantitative uncertainty estimates are assigned to the absolute SMB observations, however the authors report an average relative accumulation error of 0.02%.

### 3 Results and Discussion

#### 275 3.1 Impact of wind downscaling method on simulated surface mass balance

To demonstrate the differences between downscaling techniques, we have downscaled MERRA-2 winds from the year 2015 using both the Liston and WindNinja (Section 2.2) algorithms to the 1 km Alpine3D grid (Fig. 3). WindNinja predicts a higher average wind speed than Liston ( $6.5 \text{ m s}^{-1}$  vs.  $6.1 \text{ m s}^{-1}$ ) and is more consistent with MERRA-2 ( $6.6 \text{ m s}^{-1}$ ), which

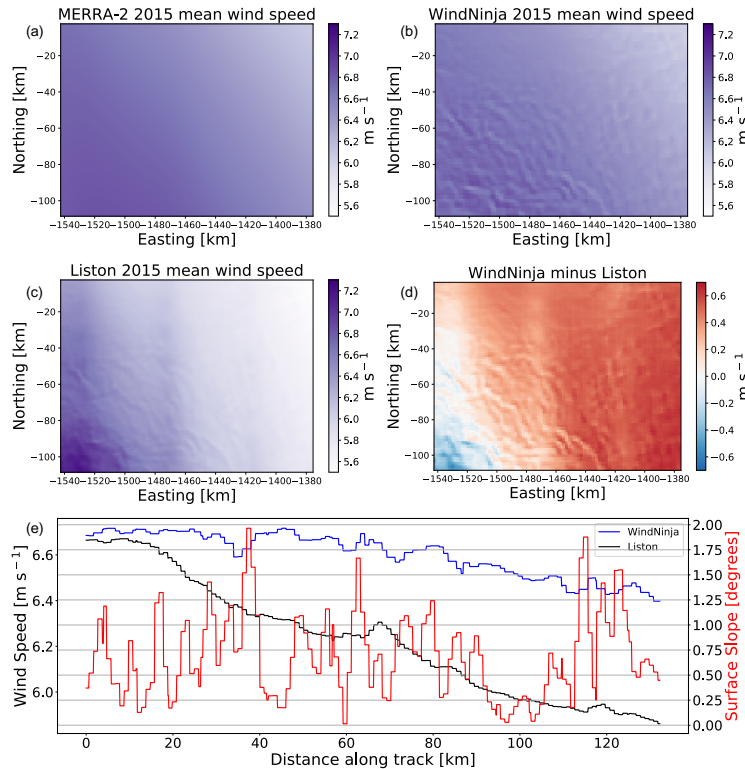

**Figure 3.** Example of wind speed downscaling for the year 2015: (a) Annual mean MERRA-2, (b) WindNinja, and (c) Liston 10 m wind speed. (d) Annual mean WindNinja minus Liston wind speed. (e) Transect (T-T' in Fig. 2b) of annual mean WindNinja and Liston wind speed as well as transect surface slope.

can be explained by WindNinja's mass conservation solver and Liston's imposed terrain weighting factor of 0.5–1.5 times  
 280 the original interpolated value (Reynolds et al., 2021). Notably, both downscaling techniques predict local topography-driven  
 wind speed variability not captured by MERRA-2, however this variability is in opposite phase, meaning that when WindNinja  
 predicts relatively high wind speed, Liston predicts locally lower wind speed. Furthermore, WindNinja predicts 2–3 times  
 larger local topography-driven wind speed variability than Liston, leading us to expect larger SMB variability in Alpine3D  
 simulations forced with WindNinja winds compared to Liston-driven simulations. Likewise, because predicted wind speed  
 285 accelerations are out of phase between the WindNinja and Liston downscaling methods, we anticipate the subsequent offline  
 coupling with Alpine3D to predict opposite patterns of deposition and erosion. Note that our modeling domain (Section 2.5)  
 lacks the necessary wind speed and direction observations required for a robust evaluation, therefore we focus our evaluation  
 on downscaled SMB, which ultimately integrates wind speed and direction and can be evaluated against observations (Section  
 2.7).

290 Owing to the largely contrasting results between the WindNinja and Liston wind downscaling techniques, we have performed  
 two 2015 Alpine3D simulations, one using WindNinja and one using Liston winds. As discussed above, the WindNinja driven

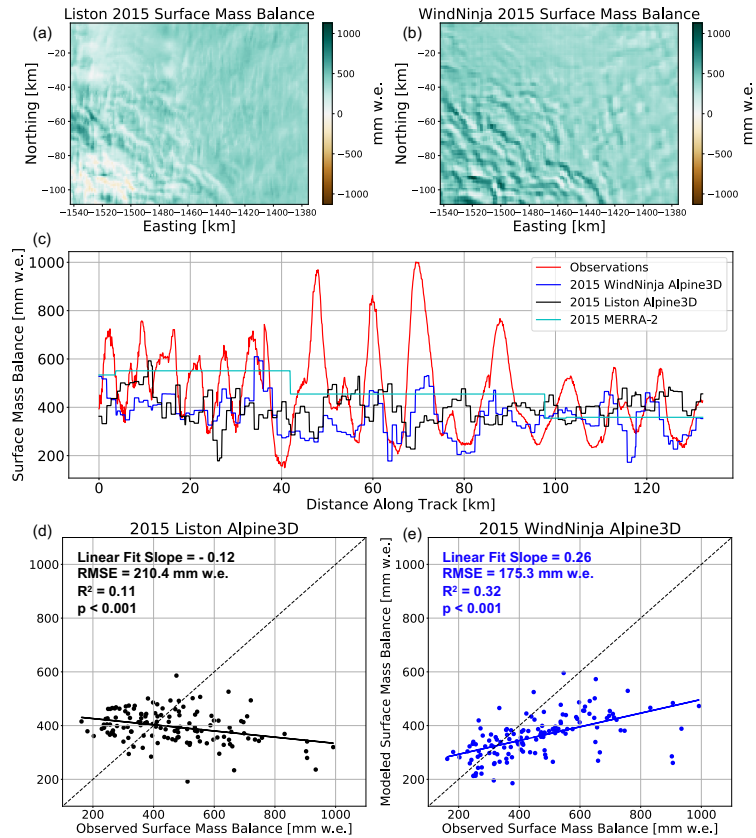

**Figure 4.** Surface mass balance downscaling: (a) 2015 Liston and (b) WindNinja Alpine3D SMB. (c) Transect of observed (red), 2015 WindNinja Alpine3D (blue), Liston Alpine3D (black) and MERRA-2 (cyan) SMB. (d, e) Scatter plot of (d) 2015 Liston and (e) WindNinja Alpine3D SMB vs. observations.

Alpine3D simulation exhibits larger SMB variability than the Liston driven simulation (Fig. 4) because of larger wind speed variability in the former. Additionally, the WindNinja driven Alpine3D simulation predicts SMB variability in phase with observations (slope = 0.26,  $p < 0.001$ ), whereas the Liston driven simulation predicts SMB variability out of phase with observations (slope = -0.12,  $p < 0.001$ ). Because the offline coupling between the Liston downscaling algorithm and Alpine3D predicts SMB variability out of phase with observations, we determine that the Liston algorithm is not suitable for our application. Thus, moving forward we only consider Alpine3D simulations driven by an offline coupling with WindNinja.

### 3.2 Alpine3D downscaled surface mass balance

Given the demonstrated performance advantage of using the offline WindNinja coupling with Alpine3D (Section 3.1), we further this analysis by evaluating a six year long Alpine3D simulation using WindNinja (2015–2020). By comparing with an approximately 130 km long observational transect, we found that based on the simulated 2015–2020 mean annual SMB,

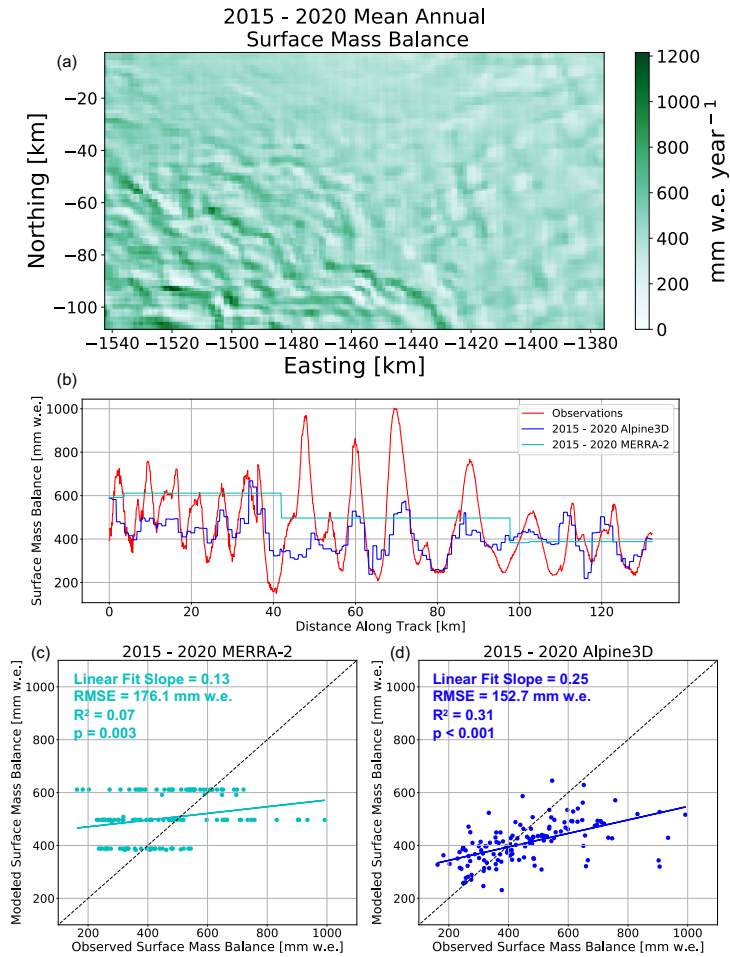

**Figure 5.** Surface mass balance downscaling: (a) 2015 – 2020 Alpine3D SMB. (b) Transect of observed (red), 2015 – 2020 mean Alpine3D (blue) and MERRA-2 (cyan) SMB. (c, d) Scatter plot of (c) 2015 – 2020 MERRA-2 and (d) Alpine3D SMB vs. observations.

Alpine3D correctly predicts the relative locations of peaks and troughs in observed SMB and explains. Under the assumption that the modeled and observed SMB are linearly related, and thus that  $R^2$  provided by the linear regression equals the variance explained, we find that Alpine3D SMB gives an additional 24% variance explained compared to MERRA-2 (31% (17 – 47% 95% confidence interval) vs. 7% (2 – 15% 95% confidence interval), Fig. 5). In particular, Alpine3D appears to improve over MERRA-2 SMB predictions as indicated by a reduction in root mean squared error (152.7 mm w.e. yr<sup>-1</sup> vs. 176.1 mm w.e. yr<sup>-1</sup>). Despite improving over MERRA-2 (slope = 0.13, p = 0.003), Alpine3D still underestimates the magnitude of observed SMB variability, as indicated by the linear fit slope being less than 1 (slope = 0.25, p < 0.001).

Generally speaking, Alpine3D correctly predicts the location of deposition and erosion as evidenced by the relative positioning of peaks and troughs in SMB. However, the simulated amplitude of deposition and erosion is underestimated when

compared to observations. This underestimation could potentially be ameliorated by ~~decreasing~~decreasing the fetch length and therefore increasing the saltation mass flux, although we show in Section 3.6 that doing so results in locally excessive erosion and in fact, negative SMB. While most peaks and troughs in SMB are captured by Alpine3D, some are missed, for example near 45 km on the transect in Fig. 5b. Several processes likely contribute to this significant model error, however the primary driver is a lack of terrain-driven wind acceleration at this point of the transect (Fig. 3e). Despite indications that this area has some of the largest SMB variability within the transect, surface slopes in the DEM are comparatively modest ( $< 1.25^\circ$ , Fig 3). Without significant surface slopes, the downscaled wind speeds are relatively homogeneous, leading Alpine3D to miss the corresponding observed SMB variability. This relatively homogeneous wind field in the presence of large observed accumulation gradients, can be potentially attributed to a combination of terrain representation errors in the DEM as well as process representation errors and simplifications within the WindNinja downscaling algorithms. Furthermore, it is worth noting that over the length of the transect, MERRA-2 2015–2020 mean annual SMB exceeds that of observations (504 and 461 mm w.e.  $\text{yr}^{-1}$ ), indicating that the 2015–2020 ~~period exceeded the long-term averages~~simulated SMB exceeded the 1980–2017 MERRA-2 mean annual SMB (Section 2.7). Despite this, mean Alpine3D downscaled SMB over the transect (410 mm w.e.  $\text{yr}^{-1}$ ) is less than both observations and MERRA-2. ~~This~~The discrepancy between MERRA-2 and Alpine3D ~~is~~along the transect is most likely explained by net divergence of saltating snow out of the analysis domain (Fig. 2), resulting in less mass available for accumulation along the transect. Since wind speeds generally increase from the top right to the bottom left over the model domain, some net divergence over the transect also may occur. Because the observations are deliberately forced to have the same mean as MERRA-2 (Section 2.7), we are unable to properly evaluate this predicted discrepancy against measurements.

### 3.3 Link between topography, surface winds, and drifting snow redistribution

Intuitively, Alpine3D is designed to preferentially erode snow in wind exposed areas and redeposit it downwind in wind sheltered zones. This is primarily achieved through the offline coupling between WindNinja and Alpine3D. In areas with spatially varying surface slope, WindNinja adjusts wind speed and direction to account for mechanical effects of terrain on the flow (Fig. 6). In the case of the transect (location shown in Fig. 2), surface slopes are relatively modest, but regularly vary between  $0.25\text{--}2.0^\circ$ . Ultimately, this rolling terrain leads WindNinja to simulate equally subtle wind speed variations up to approximately  $0.1 \text{ m s}^{-1}$ . The end result is enhanced erosion ( $0\text{--}250 \text{ mm w.e. yr}^{-1}$ ) of snow in relatively windy areas and subsequent deposition (up to  $125 \text{ mm w.e. yr}^{-1}$ ) in less windy areas. Expanding this analysis to our entire domain, we see that rolling topography drives spatially variable patterns of deposition and erosion (Fig. 6d). On average wind-driven transport processes remove  $50 \text{ mm w.e. yr}^{-1}$  from the analysis domain, while local values of erosion and deposition range from  $-514 \text{--}690 \text{ mm w.e. yr}^{-1}$ . Overall, deposition and erosion processes modify snow accumulation with an average magnitude of  $89 \text{ mm w.e. yr}^{-1}$ , which corresponds to 23% of mean annual accumulation.

### 3.4 Link between density and deposition and erosion

Altimetry-based ice sheet mass balance retrievals rely on firn density products to perform volume-to-mass conversions. Thus, accurate firn models are necessary for reliable local, regional, and continental scale mass balance assessments. Because erosion

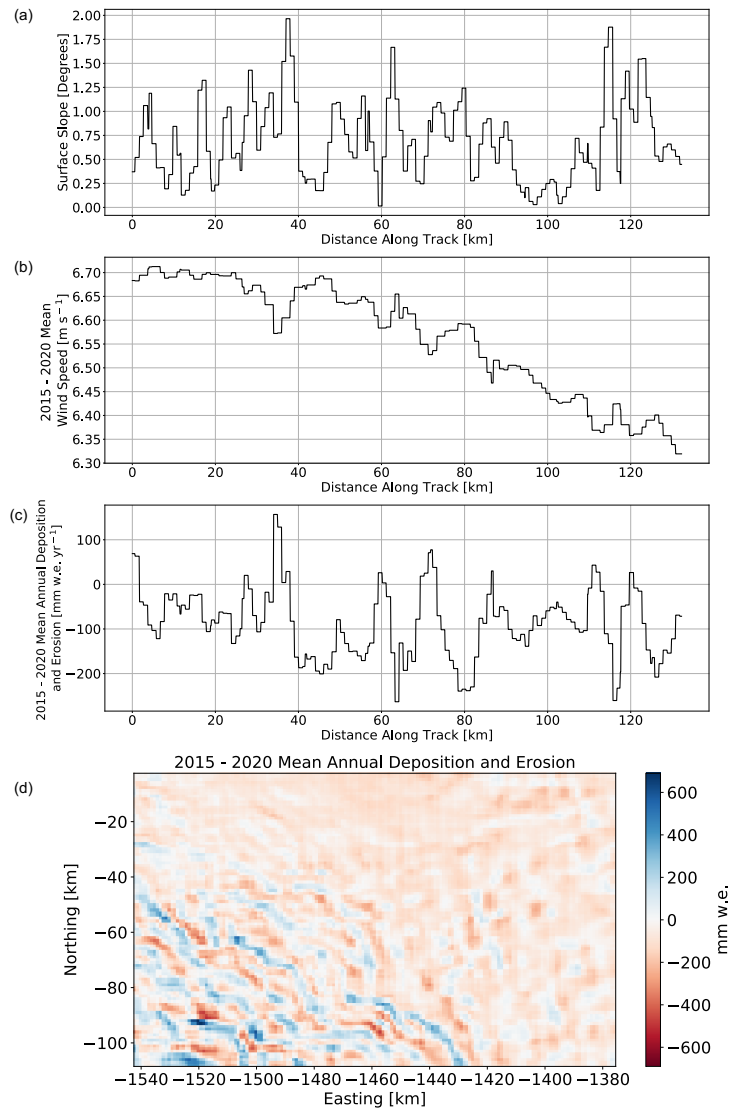

**Figure 6.** Connection between topography and snow redistribution. (a) Transect of surface slope, (b) 2015–2020 mean 10 m wind speed, and (c) 2015–2020 mean deposition and erosion. (d) Map of 2015–2020 mean annual deposition and erosion.

exposes older and denser snow layers while also coinciding with areas of elevated wind speed, one could plausibly expect  
 345 Alpine3D to predict areas with net erosion to coincide with relatively high surface density. Interestingly, we show that this is  
 not the case. Instead, Alpine3D predicts wind-driven compaction to be the dominant process, whereby eroded snow particles  
 experience densification via fragmentation and rounding on their way to subsequent deposition (Vionnet et al., 2012). By  
 comparing 2015–2020 mean annual Alpine3D surface density (defined as the mean of the top 10 cm) with deposition and  
 erosion, we find that the two are **highly** correlated ( $R = 0.74$ , Fig. 7). Although this positive correlation is not directly verified

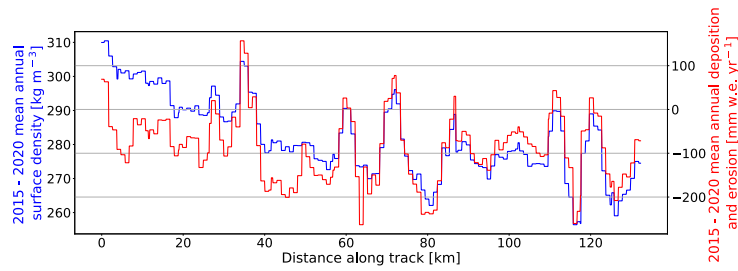

**Figure 7.** Connection between deposition and erosion and surface density (defined as the mean of the top 10 cm). Transect of 2015–2020 mean Alpine3D surface density (blue) and annual deposition and erosion (red).

350 by in-situ observations, Grima et al. (2014) found a similar correlation between surface density and local SMB perturbations over Thwaites Glacier. If for the moment we assume this model result is correct, then the accumulation product compiled by Dattler et al. (2019) most likely underestimates SMB spatial variability because of the constant surface density assumption used to initialize their firn model. Likewise, in the case of repeat altimetry, we can deduce that variable surface height change in the vicinity of rolling topography may represent enhanced mass change variability than we might otherwise expect with  
 355 a homogeneous density field. Overall, these findings should be interpreted with caution as they are not yet directly verified by observations, but likewise warrant the consideration of detailed firn density products when interpreting airborne snow accumulation radar and satellite altimetry.

### 3.5 Impact of horizontal model resolution on downscaled SMB

Depending on the Alpine3D downscaling application, it may be desirable to decrease horizontal resolution in favor of larger  
 360 domains or longer simulations. We also want to test the sensitivity of the numerics used in Alpine3D to the spatial resolution. In order to inform future modeling studies which will inevitably weigh computational costs against spatial and temporal detail, here we describe results from a 1 and 3 km horizontal resolution 2015 Alpine3D simulation. Owing primarily to reduced number of individual Alpine3D grid cells, the 3 km simulation requires only 10% of the 1 km simulation’s computational resources (Section 2.6).

365 Generally speaking, both simulations capture observed topographic-driven variability in SMB (Fig. 8), however the 1 km simulation predicts 40% larger SMB variability than the 3 km simulation. This finding can be explained by the relatively smoother terrain in the 3 km simulation, and consequently reduced terrain-induced wind speed variability. Reduced wind speed variations across subtle topography ultimately reduced the magnitude of deposition and erosion leading to a more homogeneous SMB field (Fig. 8a vs. Fig. 8b). That said, the 3 km simulation explains an additional 5% variance of observed accumulation  
 370 variability compared to the 1 km simulation, all while reducing the RMSE by 8 mm w.e. yr<sup>-1</sup> (Table 1). These improved statistics could be explained by reduced wind-transport divergence in the 3 km simulation (-48.8 vs. -51.4 mm w.e. yr<sup>-1</sup>) and subsequent reduction of the mean bias. However, given that the observed accumulation mean is controlled by MERRA-2 (Section 2.7), caution should be taken in interpreting the absolute value of observations. Overall, these findings suggest that

the 1 and 3 km simulations perform similarly, implying that the Alpine3D framework can be applied at horizontal resolutions greater than 1 km without unacceptable degradation of performance. Furthermore, because performance at 3 km horizontal resolution is comparable to that of 1 km, future Alpine3D applications can consider increasing grid spacing up to 3 km in order to expand the spatial and temporal bounds of their simulation.

**Table 1.** Linear regression statistics for different choice of horizontal resolution. Coefficient of determination ( $R^2$ ), root mean squared error (RMSE), and linear regression slope for 2015 Alpine3D simulations with 1 and 3 km horizontal resolution against observations.

| Alpine3D Horizontal Resolution   | 1 km | 3 km |
|----------------------------------|------|------|
| $R^2$                            | 0.32 | 0.37 |
| RMSE (mm w.e. yr <sup>-1</sup> ) | 175  | 167  |
| Linear regression slope          | 0.25 | 0.18 |

### 3.6 Sensitivity to prescribed fetch length

As indicated in Section 2.3, the SNOWPACK fetch length is an uncertain tuning parameter that controls the magnitude of the saltation mass flux. Furthermore, because no suitable observations or theoretical framework firmly suggest which value of fetch length to choose, here we present results from a sensitivity study designed to quantify the effect of varying the fetch length between 30, 70, and 110 m. As expected, progressively increasing the fetch length from 30 to 110 m, decreases the magnitude of deposition and erosion and consequently the spatial variability of 2015 Alpine3D simulated surface mass balance (Fig. 9). Note that by decreasing the fetch length, we increase the simulated SMB variability to be more in line with observations. However, decreasing the fetch length to 30 m, results in unrealistically strong erosion, as indicated by negative SMB values in 4.2% of grid cells. In fact, the 30 m fetch length simulation produces a larger RMSE than both the 70 and 110 m simulations (273, 175, and 164 mm w.e. yr<sup>-1</sup> respectively, Table 2). ~~Wever et al. (2022) showed that stand-alone SNOWPACK simulation results were very similar for the range of fetch lengths tested here (30, 70, and 110), suggesting that the impact we find in Alpine3D is primarily a result of the snow redistribution module (Section 2.4).~~

Despite the relatively limited breadth of our fetch length ensemble, we observe a notable trade off. As we decrease fetch length, simulated SMB variability approaches that of observations (as indicated by linear regression slopes in Table 2) while also increasing typical model errors (RMSE in Table 2). We have therefore identified a potential shortcoming of our Alpine3D downscaling framework, namely that optimizing the fetch length parameter does not result in uniformly improved results. For purely pragmatic reasons, in this study we retain the fetch length approach by choosing a middle ground value of 70 m. Nevertheless, in future model development exercises it would be useful to drop this reliance on fetch length, and instead focus on diagnosing the locally eroded mass purely from simulated snow characteristics and surface wind stress.

### 3.7 Simulation without wind redistribution of snow



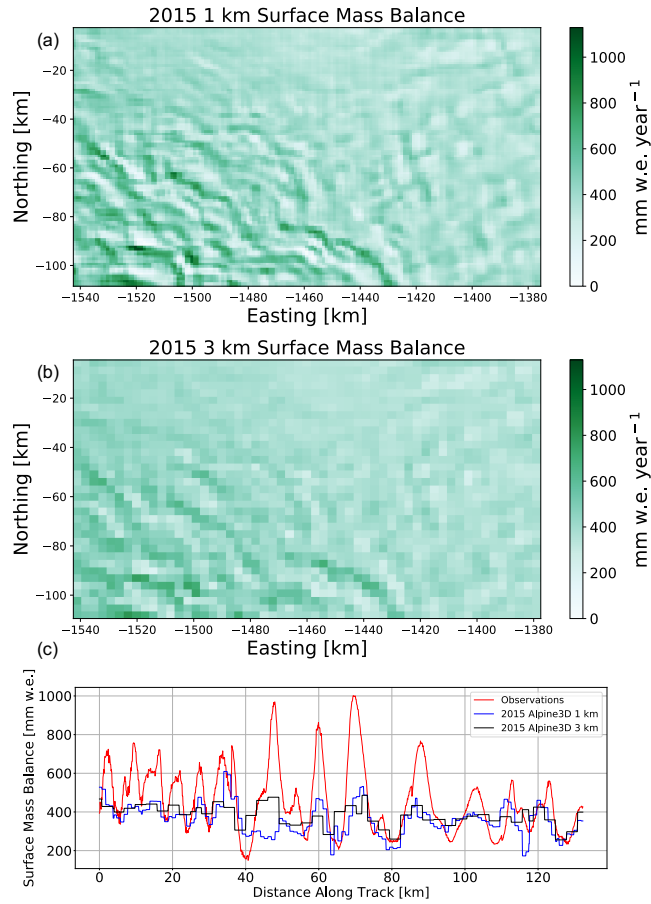

**Figure 8.** Connection between horizontal resolution and simulated SMB. 2015 simulated SMB with (a) 1 and (b) 3 km horizontal resolution. (c) Transect of observed (red) and simulated SMB with 1 (blue) and 3 km (black) horizontal resolution.

**Table 2.** Linear regression statistics for different choice of fetch length. Coefficient of determination ( $R^2$ ), root mean squared error (RMSE), and linear regression slope for 2015 Alpine3D simulations with 30, 70, and 110 m fetch length against observations.

| Fetch Length                     | 30 m | 70 m | 110 m |
|----------------------------------|------|------|-------|
| $R^2$                            | 0.30 | 0.32 | 0.31  |
| RMSE (mm w.e. yr <sup>-1</sup> ) | 273  | 175  | 164   |
| Linear regression slope          | 0.55 | 0.25 | 0.17  |

400 [Finally, we performed a simulation without activating the newly developed module for wind redistribution of snow \(Fig. 10\), while keeping the WindNinja downscaling for wind as well as the downscaling approaches for the other variables. We find that in this case, the SMB field \(Fig. 10a\) is strongly dominated by the large scale gradient in SMB resulting from the MERRA-2](#)

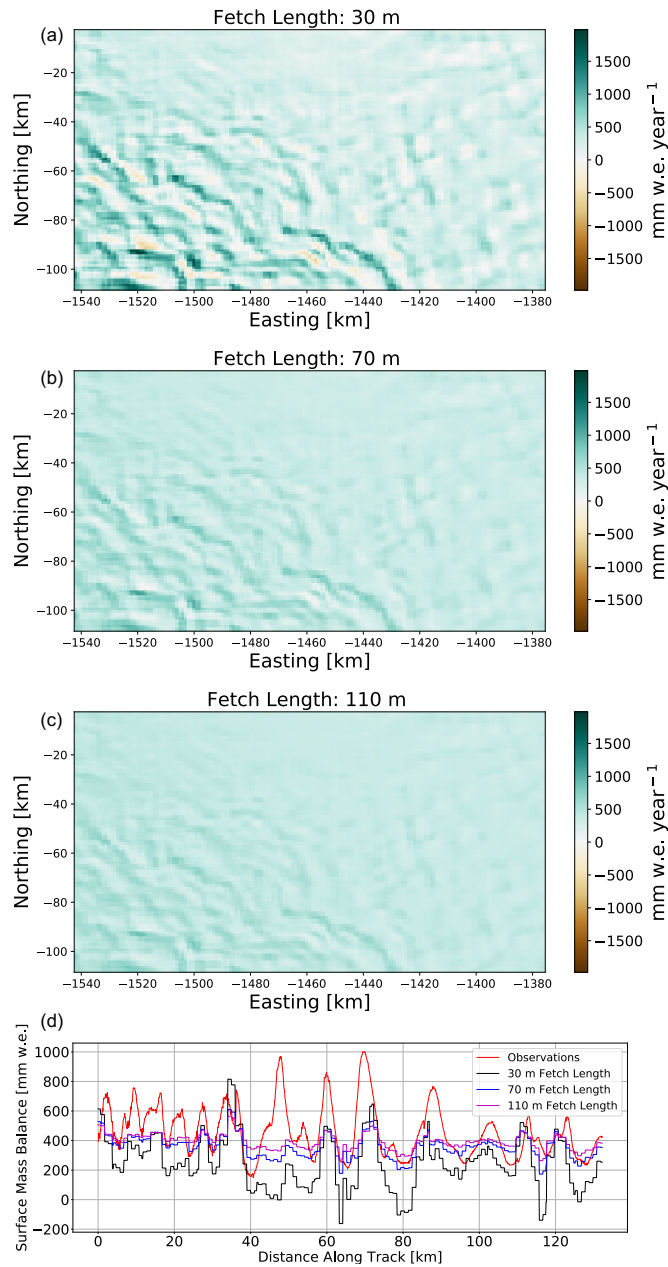

**Figure 9.** Connection between prescribed fetch length and simulated SMB. 2015 simulated SMB with (a) 30, (b) 70, and (c) 110 m fetch length. (d) Transect of observed (red), and simulated SMB with 30 (black), 70 (blue), and 110 m (magenta) fetch length.

forcing data, while lacking the small scale spatial variability found in the simulation with drifting snow shown in Fig. 4b. It illustrates that the Alpine3D simulation does not create any substantial small scale variability in SMB that could arise

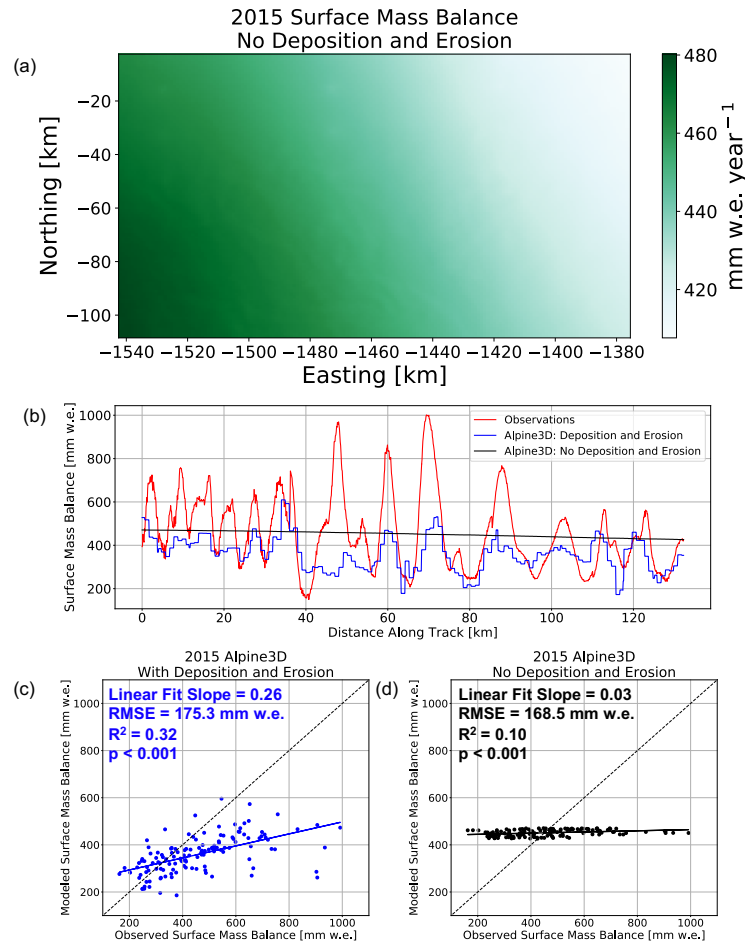

**Figure 10.** Comparing the simulation with and without wind redistribution of snow for the year 2015. (a) 2015 Alpine3D SMB without wind redistribution of snow, (b) Transect of observed (red), 2015 Alpine3D with wind redistribution (blue), 2015 Alpine3D without wind redistribution (black) SMB. (c, d) Scatter plot of (c) 2015 with wind redistribution and (d) 2015 without wind redistribution vs. observations.

from other processes. For example, wind speed also controls surface sublimation, but the effect on SMB is not noticeable on larger scales. We conclude that the simulations including the wind redistribution of snow attribute virtually all of the spatial heterogeneity in SMB to snow redistribution processes by the wind (Fig. 4c, d).

405

## 4 Conclusions

The primary way ice sheets gain accumulate mass is through net snow accumulation at the ice sheet surface, referred to as SMB. SMB quantifies the balance between processes which accumulate and ablate mass at the surface of ice sheets. Throughout the last two decades, regional climate models have been progressively developed to simulate large-scale ice sheet SMB fields.

410 However, recent advancements in observational capabilities (e.g. repeat satellite altimetry and airborne snow radar) indicate that SMB varies predictably in the presence of rolling topography. Despite the importance of capturing this SMB variability for assigning a mass change to repeat altimetry measurements, regional climate models are not capable of resolving this variability. To begin to close the gap between observations and existing regional climate models, and therefore improve local SMB estimates and support interpretation of repeat altimetry, we have expanded upon the Alpine3D framework in order to  
415 dynamically downscale Antarctic SMB.

In our implementation of Alpine3D, we leverage MeteoIO and WindNinja software to downscale meteorology onto the native Alpine3D grid. At each grid cell, the SNOWPACK snow model is used to diagnose snow properties including, density, temperature, grain size, and other snow microstructure parameters. With this information, SNOWPACK calculates a saltation mass flux for each time step and then sends this information to Alpine3D, where horizontal snow redistribution is treated  
420 as a two-dimensional advection problem. WindNinja downscaling results suggest that rolling topography with surface slopes between  $0.25 - 2.0^\circ$  are responsible for subtle terrain induced mechanical effects that vary mean wind speeds by  $0.1 \text{ m s}^{-1}$ . These wind speed perturbations ultimately drive spatially variable patterns of deposition and erosion whose mean magnitude corresponds to 23% of mean annual accumulation.

By comparing 2015 – 2020 mean annual SMB downscaling results over a portion of Pine Island Glacier, West Antarctica  
425 to a 130 km long observational SMB transect, we found that, when compared to MERRA-2, Alpine3D reduces typical SMB errors by 23.4 mm w.e. (13%) and increases variance explained by 24%. Furthermore, we show that Alpine3D produces a similarly skillful downscaled SMB product when run at 3 km horizontal resolution. This suggests that Alpine3D can be run at a coarser resolution than what is primarily shown in this study (1 km horizontal resolution), therefore considerably reducing computational cost. Finally, despite the promising downscaling results presented in this study, Alpine3D still relies on the  
430 fetch length tuning parameter to scale the saltation mass flux. We have shown [that](#) the magnitude of deposition and erosion, and consequently SMB, are sensitive to the choice of fetch length. Because it is at the very least difficult, and quite likely impossible, to uniformly optimize the fetch length, we suggest that future studies migrate towards diagnosing the saltation mass flux purely from known quantities including snow properties and surface wind stress. [Further, we note that our implementation makes important simplifications by neglecting drifting and blowing snow sublimation as well as horizontal redistribution by way of suspension. In regions where these processes are significant drivers of local SMB, future downscaling efforts would likely be improved by inclusion of these processes into Alpine3D.](#)  
435

*Code and data availability.* MeteoIO, SNOWPACK and Alpine3D are software published under the GNU LGPLv3 license by the WSL Institute for Snow and Avalanche Research SLF, Davos, Switzerland at <https://gitlabext.wsl.ch/snow-models>. The repository used to develop the versions of MeteoIO, SNOWPACK and Alpine3D used in this study can be accessed at <https://github.com/snowpack-model/snowpack> with  
440 the exact version corresponding to commit f023b9f archived at <https://doi.org/10.5281/zenodo.5914787>. MERRA-2 atmospheric reanalysis is available at <https://gmao.gsfc.nasa.gov/reanalysis/MERRA-2/> and can be retrieved and processed using our workflow available at [https://github.com/EricKeenan/download\\_MERRA2](https://github.com/EricKeenan/download_MERRA2) and archived at <https://doi.org/10.5281/zenodo.4560825>. WindNinja source code is hosted at

https://github.com/firelab/windninja while the version used in this study is permanently archived at <https://doi.org/10.5281/zenodo.4474633>. Software used to produce the numerical simulations, analyses, and figures presented in this study are archived at <https://doi.org/10.5281/zenodo.5914751> and <https://doi.org/10.5281/zenodo.5914727>. Airborne snow accumulation radar data used in this study are archived at <https://doi.org/10.5281/zenodo.3534315>.

*Author contributions.* All authors contributed to experimental design, analysis, and manuscript preparation. Eric Keenan carried out Alpine3D simulations, performed the analysis, and produced the figures. Eric Keenan and Nander Wever both contributed to Alpine3D model development.

450 *Competing interests.* The authors declare that they have no conflict of interest.

*Acknowledgements.* [The authors thank Charles Amory and an anonymous reviewer for their thoughtful comments which helped to improve the manuscript considerably.](#) Eric Keenan, Nander Wever, Jan T. M. Lenaerts, and Brooke Medley acknowledge support from the National Aeronautics and Space Administration (NASA), grant 80NSSC18K0201 (ROSES-2016: studies with ICESat-2 and CryoSat-2). This work utilized the RMACC Summit supercomputer, which is supported by the National Science Foundation (awards ACI-1532235 and ACI-1532236), the University of Colorado Boulder, and Colorado State University. The Summit supercomputer is a joint effort of the University of Colorado Boulder and Colorado State University. Data storage supported by the University of Colorado Boulder "PetaLibrary".

## References

- Alley, R. B. and Koci, B. R.: Recent Warming in Central Greenland?, *Annals of Glaciology*, 14, 6–8, <https://doi.org/10.3189/S0260305500008144>, 1990.
- 460 Amory, C., Gallée, H., Naaim-Bouvet, F., Favier, V., Vignon, E., Picard, G., Trouvilliez, A., Piard, L., Genthon, C., and Bellot, H.: Seasonal Variations in Drag Coefficient over a Sastrugi-Covered Snowfield in Coastal East Antarctica, *Boundary-Layer Meteorology*, 164, 107–133, <https://doi.org/10.1007/s10546-017-0242-5>, 2017.
- Amory, C., Kittel, C., Le Toumelin, L., Agosta, C., Delhasse, A., Favier, V., and Fettweis, X.: Performance of MAR (v3.11) in simulating the drifting-snow climate and surface mass balance of Adélie Land, East Antarctica, *Geoscientific Model Development*, 14, 3487–3510, <https://doi.org/10.5194/gmd-14-3487-2021>, 2021.
- 465 Bartelt, P. and Lehning, M.: A physical SNOWPACK model for the Swiss avalanche warning Part I: numerical model, *Cold Regions Science and Technology*, p. 23, 2002.
- Bavay, M. and Egger, T.: MeteIO 2.4.2: a preprocessing library for meteorological data, *Geoscientific Model Development*, 7, 3135–3151, <https://doi.org/10.5194/gmd-7-3135-2014>, 2014.
- 470 Bintanja, R.: Snowdrift suspension and atmospheric turbulence. Part I: Theoretical background and model description, *Boundary-Layer Meteorology*, 95, 343–368, <https://doi.org/10.1023/A:1002676804487>, 2000.
- Clifton, A., Rüedi, J.-D., and Lehning, M.: Snow saltation threshold measurements in a drifting-snow wind tunnel, *Journal of Glaciology*, 52, 585–596, <https://doi.org/10.3189/172756506781828430>, 2006.
- Comola, F., Gaume, J., Kok, J. F., and Lehning, M.: Cohesion-Induced Enhancement of Aeolian Saltation, *Geophysical Research Letters*, 46, 5566–5574, <https://doi.org/10.1029/2019GL082195>, 2019a.
- 475 Comola, F., Giometto, M. G., Salesky, S. T., Parlange, M. B., and Lehning, M.: Preferential Deposition of Snow and Dust Over Hills: Governing Processes and Relevant Scales, *Journal of Geophysical Research: Atmospheres*, 124, 7951–7974, <https://doi.org/10.1029/2018JD029614>, 2019b.
- Courant, R., Friedrichs, K., and Lewy, H.: Über die partiellen Differenzgleichungen der mathematischen Physik, *Mathematische Annalen*, 480 100, 32–74, <https://doi.org/10.1007/BF01448839>, 1928.
- Dattler, M. E., Lenaerts, J. T. M., and Medley, B.: Significant Spatial Variability in Radar-Derived West Antarctic Accumulation Linked to Surface Winds and Topography, *Geophysical Research Letters*, 46, 13 126–13 134, <https://doi.org/10.1029/2019GL085363>, 2019.
- Forthofer, J. M., Butler, B. W., and Wagenbrenner, N. S.: A comparison of three approaches for simulating fine-scale surface winds in support of wildland fire management. Part I. Model formulation and comparison against measurements, *International Journal of Wildland Fire*, 485 23, 969, <https://doi.org/10.1071/WF12089>, 2014.
- Gelaro, R., McCarty, W., Suárez, M. J., Todling, R., Molod, A., Takacs, L., Randles, C. A., Darmenov, A., Bosilovich, M. G., Reichle, R., Wargan, K., Coy, L., Cullather, R., Draper, C., Akella, S., Buchard, V., Conaty, A., da Silva, A. M., Gu, W., Kim, G.-K., Koster, R., Lucchesi, R., Merkova, D., Nielsen, J. E., Partyka, G., Pawson, S., Putman, W., Rienecker, M., Schubert, S. D., Sienkiewicz, M., and Zhao, B.: The Modern-Era Retrospective Analysis for Research and Applications, Version 2 (MERRA-2), *Journal of Climate*, 30, 5419–5454, <https://doi.org/10.1175/JCLI-D-16-0758.1>, 2017.
- 490 Gerber, F., Lehning, M., Hoch, S. W., and Mott, R.: A close-ridge small-scale atmospheric flow field and its influence on snow accumulation, *Journal of Geophysical Research: Atmospheres*, 122, 7737–7754, <https://doi.org/https://doi.org/10.1002/2016JD026258>, 2017.

- Grima, C., Blankenship, D. D., Young, D. A., and Schroeder, D. M.: Surface slope control on firn density at Thwaites Glacier, West Antarctica: Results from airborne radar sounding: SURFACE SLOPE CONTROL ON FIRN DENSITY, *Geophysical Research Letters*, 41, 495 6787–6794, <https://doi.org/10.1002/2014GL061635>, 2014.
- Gromke, C., Horender, S., Walter, B., and Lehning, M.: Snow particle characteristics in the saltation layer, *Journal of Glaciology*, 60, 431–439, <https://doi.org/10.3189/2014JoG13J079>, 2014.
- Groot Zwaaftink, C. D., Cagnati, A., Crepez, A., Fierz, C., Macelloni, G., Valt, M., and Lehning, M.: Event-driven deposition of snow on the Antarctic Plateau: analyzing field measurements with SNOWPACK, *The Cryosphere*, 7, 333–347, <https://doi.org/10.5194/tc-7-333-2013>, 500 2013.
- Hames, O., Jafari, M., Wagner, D. N., Raphael, I., Clemens-Sewall, D., Polashenski, C., Shupe, M. D., Schneebeli, M., and Lehning, M.: Modeling the small-scale deposition of snow onto structured Arctic sea ice during a MOSAiC storm using snowBedFoam 1.0., *Geoscientific Model Development*, 15, 6429–6449, <https://doi.org/10.5194/gmd-15-6429-2022>, 2022.
- Helbig, N.: Application of the radiosity approach to the radiation balance in complex terrain, Ph.D. thesis, University of Zurich, Switzerland, 505 <https://doi.org/10.5167/UZH-30798>, publisher: University of Zurich, 2009.
- Herron, M. M. and Langway, C. C.: Firn Densification: An Empirical Model, *Journal of Glaciology*, 25, 373–385, <https://doi.org/10.3189/S0022143000015239>, 1980.
- Kausch, T., Lhermitte, S., Lenaerts, J. T. M., Wever, N., Inoue, M., Pattyn, F., Sun, S., Wauthy, S., Tison, J.-L., and van de Berg, W. J.: Impact of coastal East Antarctic ice rises on surface mass balance: insights from observations and modeling, *The Cryosphere*, 14, 3367–3380, 510 <https://doi.org/10.5194/tc-14-3367-2020>, 2020.
- Keenan, E., Wever, N., Dattler, M., Lenaerts, J. T. M., Medley, B., Kuipers Munneke, P., and Reijmer, C.: Physics-based SNOWPACK model improves representation of near-surface Antarctic snow and firn density, *The Cryosphere*, 15, 1065–1085, <https://doi.org/10.5194/tc-15-1065-2021>, 2021.
- Lawrence, D. M., Fisher, R. A., Koven, C. D., Oleson, K. W., Swenson, S. C., Bonan, G., Collier, N., Ghimire, B., Kampenhout, L., 515 Kennedy, D., Kluzek, E., Lawrence, P. J., Li, F., Li, H., Lombardozi, D., Riley, W. J., Sacks, W. J., Shi, M., Vertenstein, M., Wieder, W. R., Xu, C., Ali, A. A., Badger, A. M., Bisht, G., Broeke, M., Brunke, M. A., Burns, S. P., Buzan, J., Clark, M., Craig, A., Dahlin, K., Drewniak, B., Fisher, J. B., Flanner, M., Fox, A. M., Gentine, P., Hoffman, F., Keppel-Aleks, G., Knox, R., Kumar, S., Lenaerts, J., Leung, L. R., Lipscomb, W. H., Lu, Y., Pandey, A., Pelletier, J. D., Perket, J., Randerson, J. T., Ricciuto, D. M., Sanderson, B. M., Slater, A., Subin, Z. M., Tang, J., Thomas, R. Q., Val Martin, M., and Zeng, X.: The Community Land Model Version 5: Description of New Features, Benchmarking, and Impact of Forcing Uncertainty, *Journal of Advances in Modeling Earth Systems*, 11, 4245–4287, 520 <https://doi.org/10.1029/2018MS001583>, 2019.
- Lehning, M. and Fierz, C.: Assessment of snow transport in avalanche terrain, *Cold Regions Science and Technology*, 51, 240–252, <https://doi.org/10.1016/j.coldregions.2007.05.012>, 2008.
- Lehning, M., Bartelt, P., Brown, B., and Fierz, C.: A physical SNOWPACK model for the Swiss avalanche warning Part III: meteorological forcing, thin layer formation and evaluation, *Cold Regions Science and Technology*, p. 16, 2002a.
- Lehning, M., Bartelt, P., Brown, B., Fierz, C., and Satyawali, P.: A physical SNOWPACK model for the Swiss avalanche warning Part II. Snow microstructure, *Cold Regions Science and Technology*, p. 21, 2002b.
- Lehning, M., Völksch, I., Gustafsson, D., Nguyen, T. A., Stähli, M., and Zappa, M.: ALPINE3D: a detailed model of mountain surface processes and its application to snow hydrology, *Hydrological Processes*, 20, 2111–2128, <https://doi.org/10.1002/hyp.6204>, 2006.

- 530 Lehning, M., Löwe, H., Rysler, M., and Raderschall, N.: Inhomogeneous precipitation distribution and snow transport in steep terrain: SNOW DRIFT AND INHOMOGENEOUS PRECIPITATION, *Water Resources Research*, 44, <https://doi.org/10.1029/2007WR006545>, 2008.
- Lenaerts, J. T., Brown, J., Van Den Broeke, M. R., Matsuoka, K., Drews, R., Callens, D., Philippe, M., Gorodetskaya, I. V., Van Meijgaard, E., Reijmer, C. H., Pattyn, F., and Van Lipzig, N. P.: High variability of climate and surface mass balance induced by Antarctic ice rises, *Journal of Glaciology*, 60, 1101–1110, <https://doi.org/10.3189/2014JoG14J040>, 2014.
- 535 Lenaerts, J. T. M. and van den Broeke, M. R.: Modeling drifting snow in Antarctica with a regional climate model: 2. Results: DRIFTING SNOW IN ANTARCTICA, 2, *Journal of Geophysical Research: Atmospheres*, 117, n/a–n/a, <https://doi.org/10.1029/2010JD015419>, 2012.
- Lenaerts, J. T. M., Medley, B., Broeke, M. R., and Wouters, B.: Observing and Modeling Ice Sheet Surface Mass Balance, *Reviews of Geophysics*, 57, 376–420, <https://doi.org/10.1029/2018RG000622>, 2019.
- Ligtenberg, S.: The present and future state of the Antarctic firn layer, Ph.D. thesis, Utrecht University, the Netherlands, <https://dspace.library.uu.nl/handle/1874/291634>, 2014.
- 540 Ligtenberg, S. R. M., Helsen, M. M., and van den Broeke, M. R.: An improved semi-empirical model for the densification of Antarctic firn, *The Cryosphere*, 5, 809–819, <https://doi.org/10.5194/tc-5-809-2011>, 2011.
- Liston, G. E. and Elder, K.: A Meteorological Distribution System for High-Resolution Terrestrial Modeling (MicroMet), *Journal of Hydrometeorology*, 7, 217–234, <https://doi.org/10.1175/JHM486.1>, 2006.
- 545 Liston, G. E. and Sturm, M.: A snow-transport model for complex terrain, *Journal of Glaciology*, 44, 498–516, <https://doi.org/10.3189/S0022143000002021>, 1998.
- Liston, G. E., Haehnel, R. B., Sturm, M., Hiemstra, C. A., Berezovskaya, S., and Tabler, R. D.: Simulating complex snow distributions in windy environments using SnowTran-3D, *Journal of Glaciology*, 53, 241–256, <https://doi.org/10.3189/172756507782202865>, 2007.
- Mann, G. W.: Surface Heat and Water Vapour Budgets over Antarctica, Ph.D. thesis, University of Leeds, UK, [https://citeseerx.ist.psu.edu/doc\\_view/pid/2f57251ccf36be44b54367971d8c775386675020](https://citeseerx.ist.psu.edu/doc_view/pid/2f57251ccf36be44b54367971d8c775386675020), 1998.
- 550 Martin, P. J. and Peel, D. A.: The Spatial Distribution of 10 m Temperatures in the Antarctic Peninsula, *Journal of Glaciology*, 20, 311–317, <https://doi.org/10.3189/S0022143000013861>, 1978.
- Matsuoka, K., Skoglund, A., and Roth, G.: Quantarctica, <https://doi.org/10.21334/NPOLAR.2018.8516E961>, type: dataset, 2018.
- Medley, B., Lenaerts, J. T. M., Dattler, M., Keenan, E., and Wever, N.: Predicting Antarctic Net Snow Accumulation at the Kilometer Scale and Its Impact on Observed Height Changes, *Geophys. Res. Lett.*, 49, e2022GL099330, <https://doi.org/https://doi.org/10.1029/2022GL099330>, e2022GL099330 2022GL099330, 2022a.
- 555 Medley, B., Neumann, T. A., Zwally, H. J., Smith, B. E., and Stevens, C. M.: Simulations of firn processes over the Greenland and Antarctic ice sheets: 1980–2021, *Cryosphere*, 16, 3971–4011, <https://doi.org/10.5194/tc-16-3971-2022>, 2022b.
- Melo, D. B., Sharma, V., Comola, F., Sigmund, A., and Lehning, M.: Modeling Snow Saltation: The Effect of Grain Size and Interparticle Cohesion, *Journal of Geophysical Research: Atmospheres*, 127, <https://doi.org/10.1029/2021JD035260>, 2022.
- 560 Michel, A., Schaeffli, B., Wever, N., Zekollari, H., Lehning, M., and Huwald, H.: Future water temperature of rivers in Switzerland under climate change investigated with physics-based models, *Hydrology and Earth System Sciences*, 26, 1063–1087, <https://doi.org/10.5194/hess-26-1063-2022>, 2022.
- Mott, R., Faure, F., Lehning, M., Löwe, H., Hynek, B., Michlmayer, G., Prokop, A., and Schöner, W.: Simulation of seasonal snow-cover distribution for glacierized sites on Sonnblick, Austria, with the Alpine3D model, *Annals of Glaciology*, 49, 155–160, <https://doi.org/10.3189/172756408787814924>, 2008.



- Mott, R., Schirmer, M., Bavay, M., Grünewald, T., and Lehning, M.: Understanding snow-transport processes shaping the mountain snow-cover, *The Cryosphere*, 4, 545–559, <https://doi.org/10.5194/tc-4-545-2010>, 2010.
- Nishimura, K. and Nemoto, M.: Blowing snow at Mizuho station, Antarctica, *Philosophical Transactions of the Royal Society A: Mathematical, Physical and Engineering Sciences*, 363, 1647–1662, <https://doi.org/10.1098/rsta.2005.1599>, 2005.
- 570 Palm, S. P., Kayetha, V., Yang, Y., and Pauly, R.: Blowing snow sublimation and transport over Antarctica from 11 years of CALIPSO observations, *The Cryosphere*, 11, 2555–2569, <https://doi.org/10.5194/tc-11-2555-2017>, 2017.
- Paterna, E., Crivelli, P., and Lehning, M.: Decoupling of mass flux and turbulent wind fluctuations in drifting snow: Wind-Saltation Coupling in Drifting Snow, *Geophysical Research Letters*, 43, 4441–4447, <https://doi.org/10.1002/2016GL068171>, 2016.
- 575 Picard, G., Arnaud, L., Caneill, R., Lefebvre, E., and Lamare, M.: Observation of the process of snow accumulation on the Antarctic Plateau by time lapse laser scanning, *The Cryosphere*, 13, 1983–1999, <https://doi.org/10.5194/tc-13-1983-2019>, 2019.
- Pomeroy, J. and Male, D.: Steady-state suspension of snow, *J. Hydrol.*, 136, 275–301, [https://doi.org/https://doi.org/10.1016/0022-1694\(92\)90015-N](https://doi.org/https://doi.org/10.1016/0022-1694(92)90015-N), 1992.
- Pomeroy, J. W. and Gray, D. M.: Saltation of snow, *Water Resources Research*, 26, 1583–1594, <https://doi.org/10.1029/WR026i007p01583>,  
580 1990.
- Reynolds, D. S., Pflug, J. M., and Lundquist, J. D.: Evaluating Wind Fields for Use in Basin-Scale Distributed Snow Models, *Water Resources Research*, 57, <https://doi.org/10.1029/2020WR028536>, 2021.
- Rignot, E., Velicogna, I., van den Broeke, M. R., Monaghan, A., and Lenaerts, J. T. M.: Acceleration of the contribution of the Greenland and Antarctic ice sheets to sea level rise: ACCELERATION OF ICE SHEET LOSS, *Geophysical Research Letters*, 38, n/a–n/a,  
585 <https://doi.org/10.1029/2011GL046583>, 2011.
- Schmidt, R. A.: Threshold Wind-Speeds and Elastic Impact in Snow Transport, *Journal of Glaciology*, 26, 453–467, <https://doi.org/10.1017/S0022143000010972>, 1980.
- Sharma, V., Gerber, F., and Lehning, M.: Introducing CRYOWRF v1.0: multiscale atmospheric flow simulations with advanced snow cover modelling, *Geoscientific Model Development*, 16, 719–749, <https://doi.org/10.5194/gmd-16-719-2023>, 2023.
- 590 Shepherd, A., Ivins, E. R., A. G., Barletta, V. R., Bentley, M. J., Bettadpur, S., Briggs, K. H., Bromwich, D. H., Forsberg, R., Galin, N., Horwath, M., Jacobs, S., Joughin, I., King, M. A., Lenaerts, J. T. M., Li, J., Ligtenberg, S. R. M., Luckman, A., Luthcke, S. B., McMillan, M., Meister, R., Milne, G., Mouginot, J., Muir, A., Nicolas, J. P., Paden, J., Payne, A. J., Pritchard, H., Rignot, E., Rott, H., Sorensen, L. S., Scambos, T. A., Scheuchl, B., Schrama, E. J. O., Smith, B., Sundal, A. V., van Angelen, J. H., van de Berg, W. J., van den Broeke, M. R., Vaughan, D. G., Velicogna, I., Wahr, J., Whitehouse, P. L., Wingham, D. J., Yi, D., Young, D., and Zwally, H. J.: A Reconciled  
595 Estimate of Ice-Sheet Mass Balance, *Science*, 338, 1183–1189, <https://doi.org/10.1126/science.1228102>, 2012.
- Smith, B., Fricker, H. A., Gardner, A. S., Medley, B., Nilsson, J., Paolo, F. S., Holschuh, N., Adusumilli, S., Brunt, K., Csatho, B., Harbeck, K., Markus, T., Neumann, T., Siegfried, M. R., and Zwally, H. J.: Pervasive ice sheet mass loss reflects competing ocean and atmosphere processes, *Science*, p. eaaz5845, <https://doi.org/10.1126/science.aaz5845>, 2020.
- Sørensen, M.: An analytic model of wind-blown sand transport, in: *Aeolian Grain Transport 1*, edited by Barndorff-Nielsen, O. E. and  
600 Willetts, B. B., vol. 1, pp. 67–81, Springer Vienna, Vienna, [https://doi.org/10.1007/978-3-7091-6706-9\\_4](https://doi.org/10.1007/978-3-7091-6706-9_4), series Title: Acta Mechanica Supplementum, 1991.
- Sørensen, M.: On the rate of aeolian sand transport, *Geomorphology*, 59, 53–62, <https://doi.org/10.1016/j.geomorph.2003.09.005>, 2004.
- The IMBIE team: Mass balance of the Antarctic Ice Sheet from 1992 to 2017, *Nature*, 558, 219–222, <https://doi.org/10.1038/s41586-018-0179-y>, 2018.

- 605 Verjans, V., Leeson, A. A., McMillan, M., Stevens, C. M., van Wessem, J. M., van de Berg, W. J., van den Broeke, M. R., Kittel, C., Amory, C., Fettweis, X., Hansen, N., Boberg, F., and Mottram, R.: Uncertainty in East Antarctic Firm Thickness Constrained Using a Model Ensemble Approach, *Geophysical Research Letters*, 48, <https://doi.org/10.1029/2020GL092060>, 2021.
- Vionnet, V.: Études du transport de la neige par le vent en conditions alpines : observations et simulations à l'aide d'un modèle couplé atmosphère/manteau neigeux, Ph.D. thesis, Sciences et Techniques de l'Environnement, Université Paris-Est, France, <https://tel.archives-ouvertes.fr/tel-00781279>, 2012.
- 610 Vionnet, V., Brun, E., Morin, S., Boone, A., Faroux, S., Le Moigne, P., Martin, E., and Willemet, J.-M.: The detailed snowpack scheme Crocus and its implementation in SURFEX v7.2, *Geoscientific Model Development*, 5, 773–791, <https://doi.org/10.5194/gmd-5-773-2012>, 2012.
- Vionnet, V., Martin, E., Masson, V., Guyomarc'h, G., Naaim-Bouvet, F., Prokop, A., Durand, Y., and Lac, C.: Simulation of wind-induced snow transport and sublimation in alpine terrain using a fully coupled snowpack/atmosphere model, *The Cryosphere*, 8, 395–415, <https://doi.org/10.5194/tc-8-395-2014>, 2014.
- 615 Wagenbrenner, N. S., Forthofer, J. M., Lamb, B. K., Shannon, K. S., and Butler, B. W.: Downscaling surface wind predictions from numerical weather prediction models in complex terrain with WindNinja, *Atmospheric Chemistry and Physics*, 16, 5229–5241, <https://doi.org/10.5194/acp-16-5229-2016>, 2016.
- Wever, N., Rossmann, L., Maaß, N., Leonard, K. C., Kaleschke, L., Nicolaus, M., and Lehning, M.: Version 1 of a sea ice module for the physics-based, detailed, multi-layer SNOWPACK model, *Geoscientific Model Development*, 13, 99–119, <https://doi.org/10.5194/gmd-13-99-2020>, 2020.
- 620 Wever, N., Keenan, E., Amory, C., Lehning, M., Sigmund, A., Huwald, H., and Lenaerts, J. T. M.: Observations and simulations of new snow density in the drifting snow-dominated environment of Antarctica, *J. Glaciol.*, pp. 1–18, <https://doi.org/10.1017/jog.2022.102>, 2022.
- Zwally, H. J., Li, J., Robbins, J. W., Saba, J. L., Yi, D., and Brenner, A. C.: Mass gains of the Antarctic ice sheet exceed losses, *Journal of Glaciology*, 61, 1019–1036, <https://doi.org/10.3189/2015JoG15J071>, 2015.
- 625
